# Supplementary material for: Increased O-GlcNAcylation by Upregulation of Mitochondrial O-GlcNAc Transferase (mOGT) Inhibits the Activity of Respiratory Chain Complexes and Controls Cellular Bioenergetics
Source: MDPI journal article supplement (doi:10.3390/cancers16051048), 2024-03-05
Supplement: s1 [file s1]

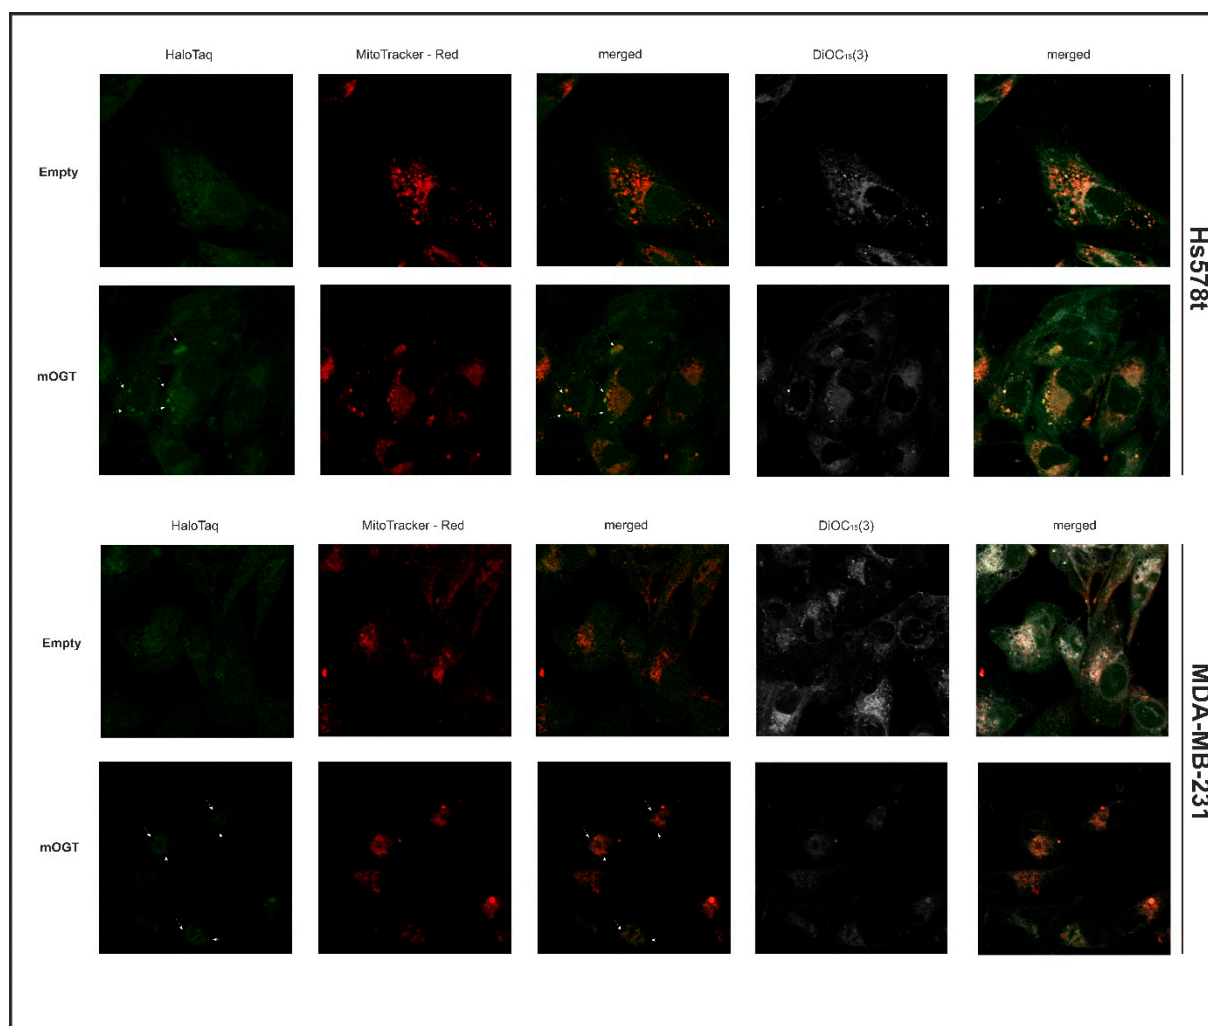

**Figure S1.** mOGT targets mitochondria in breast cancer MDA-MB-231 and Hs578t cell lines.

Figure 1B.

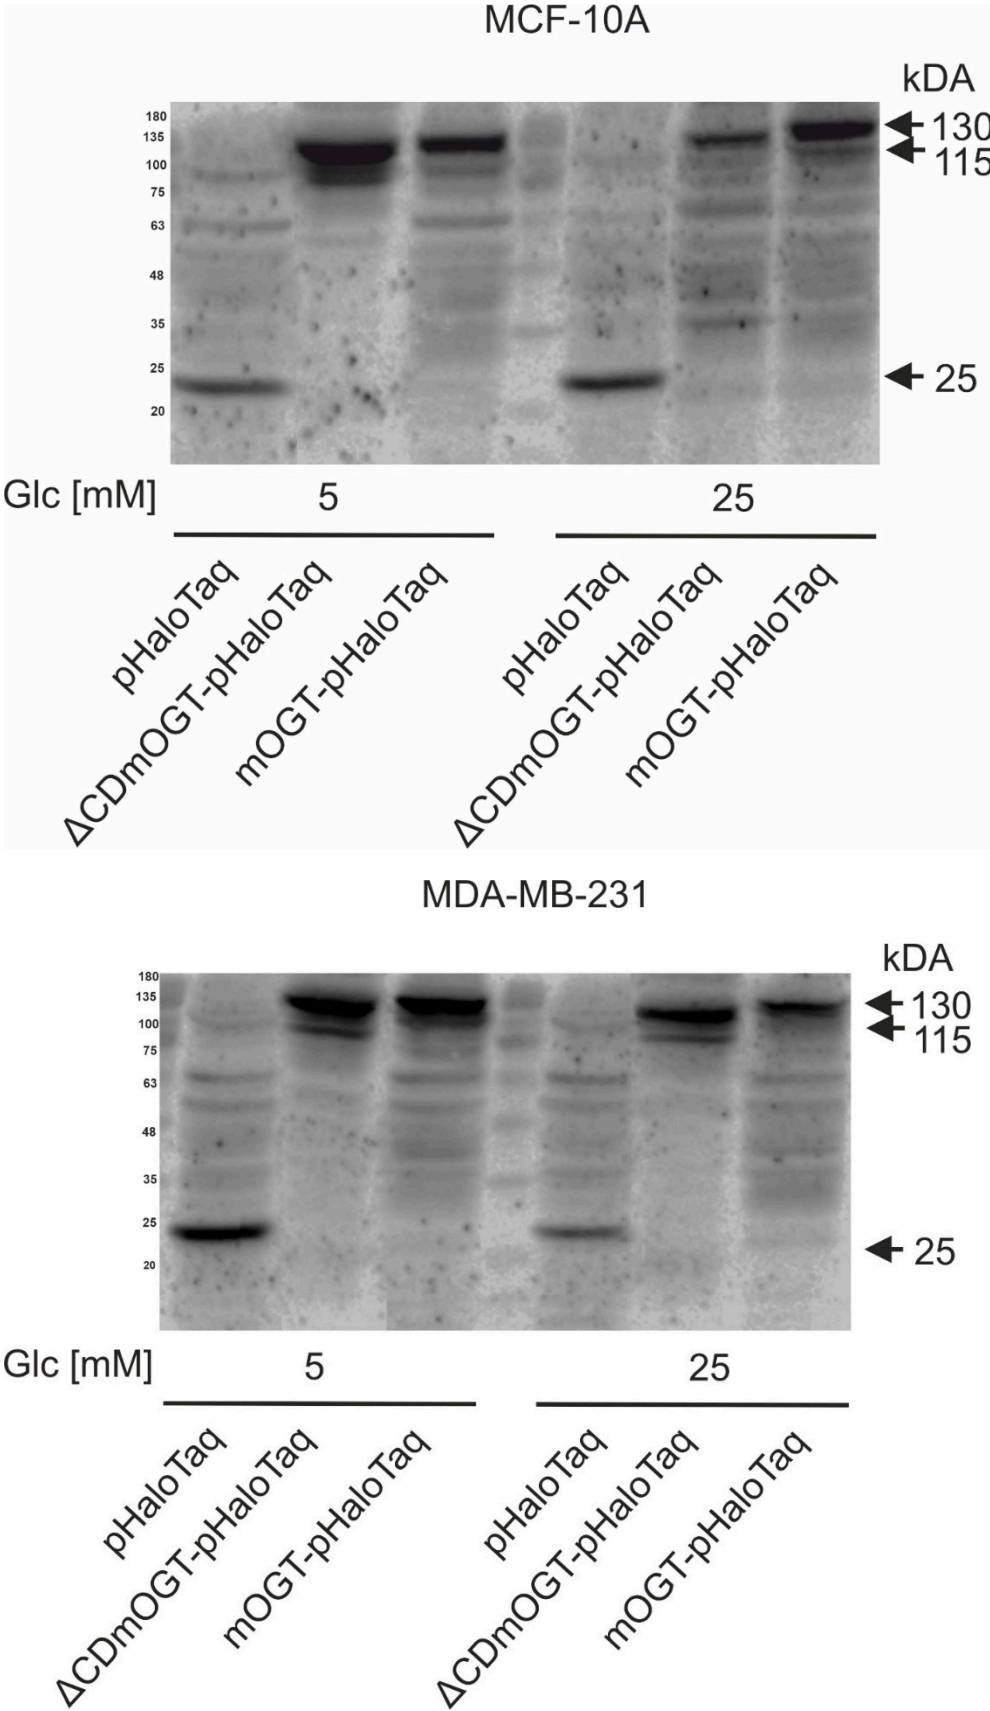

Hs 578t

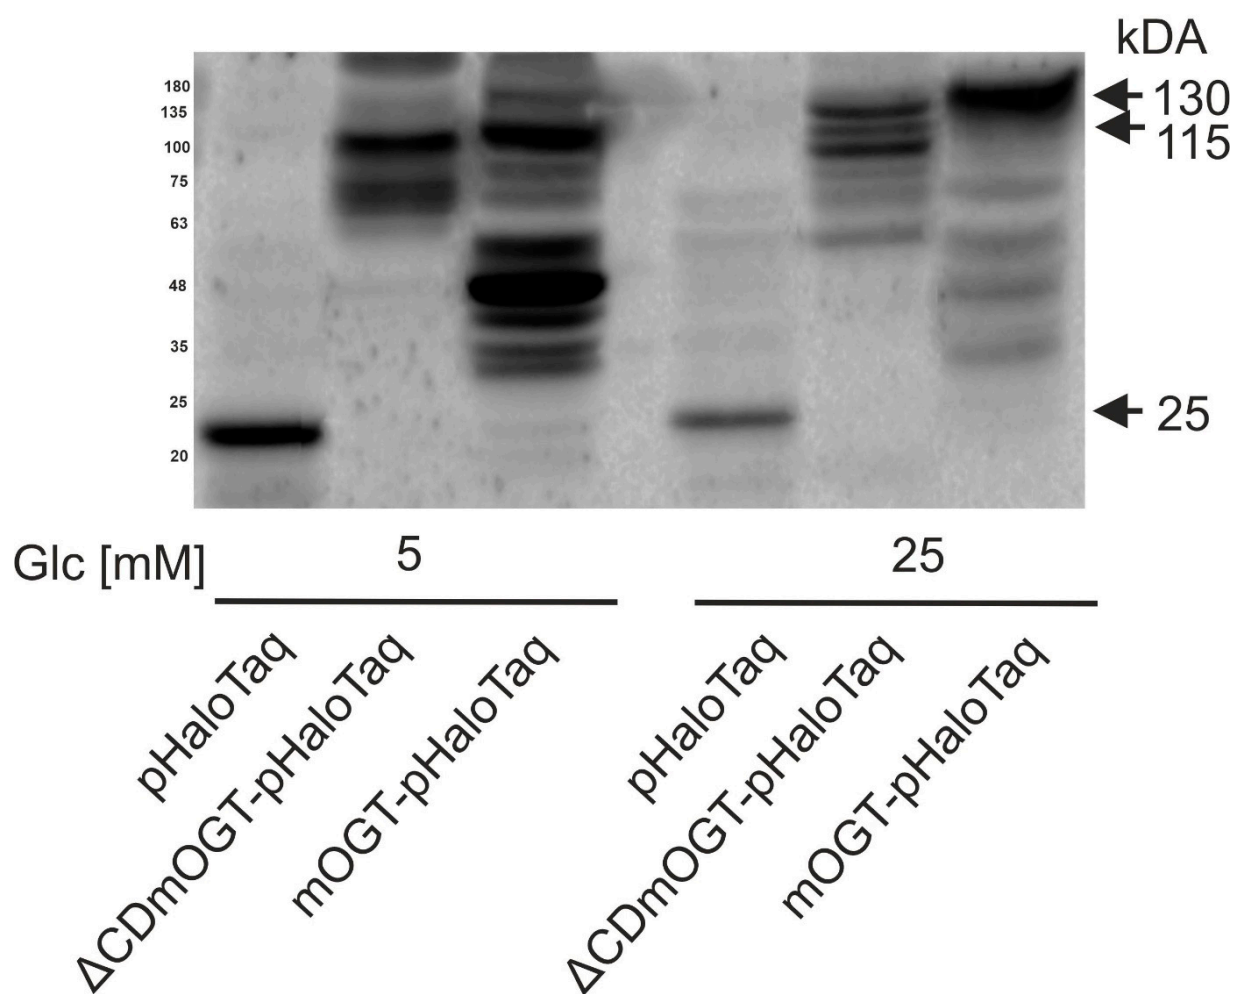

Figure 1D

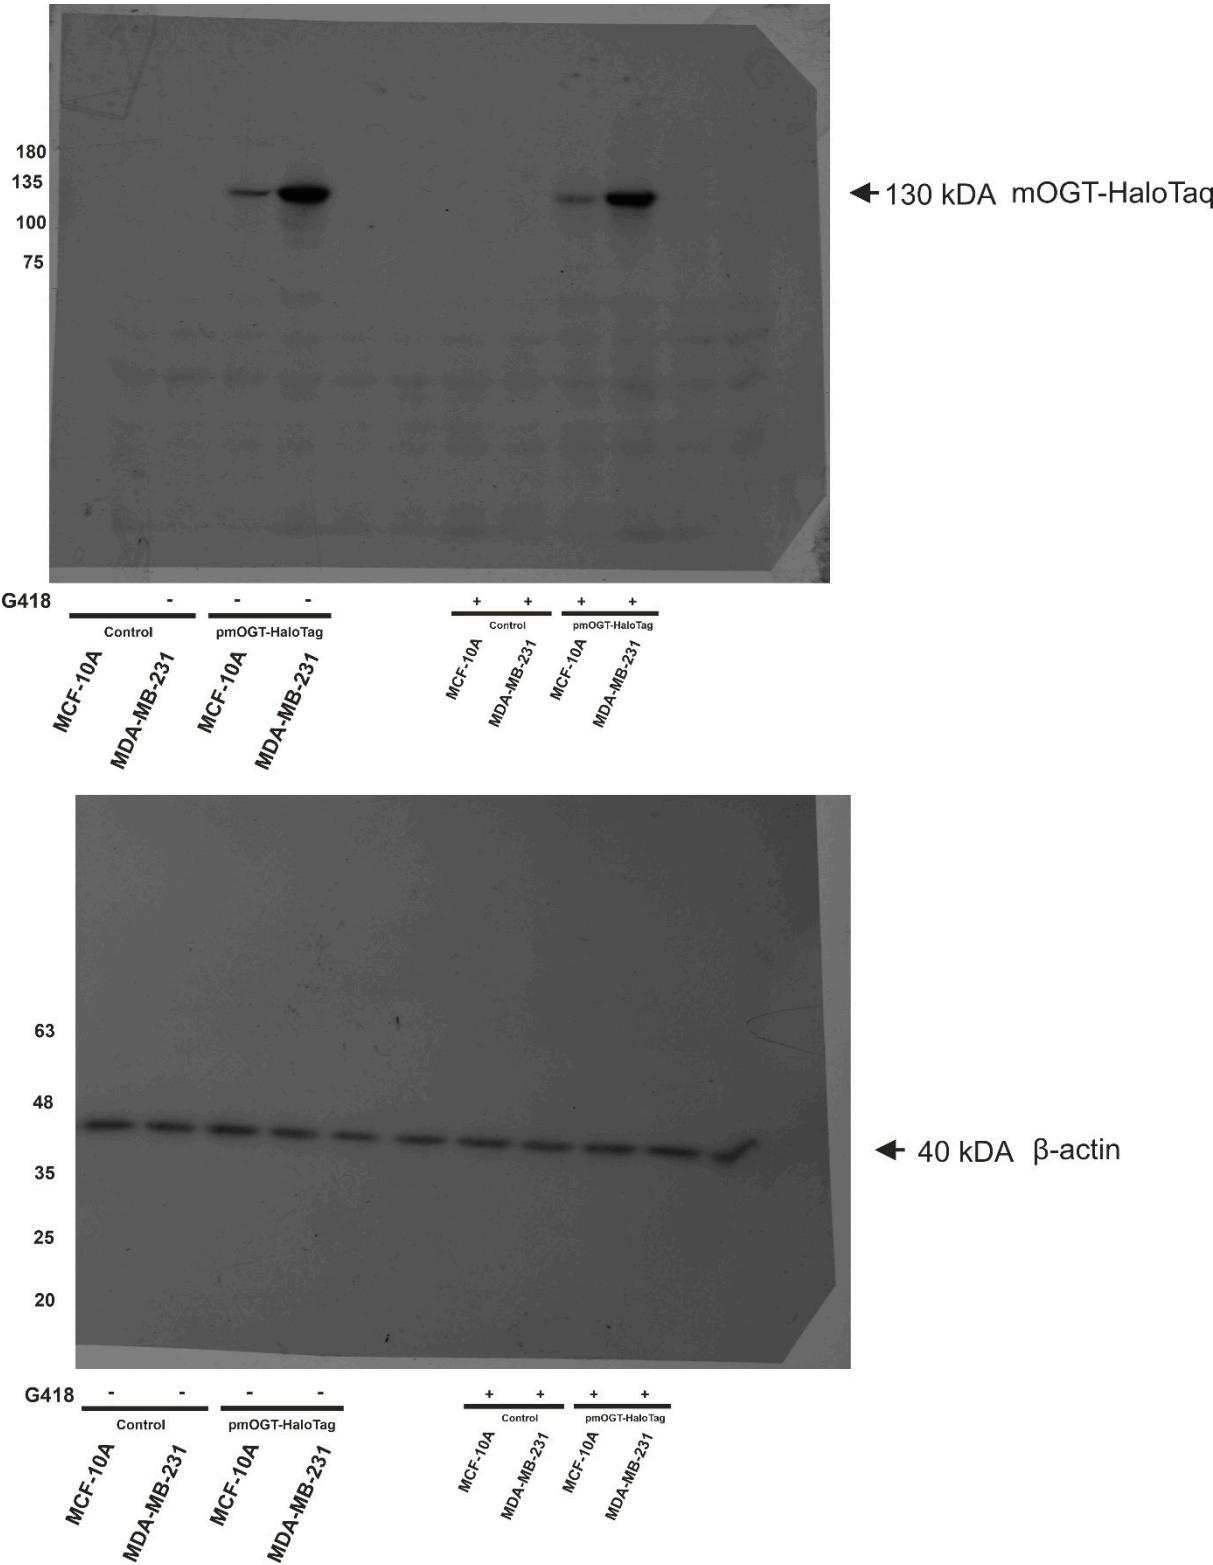

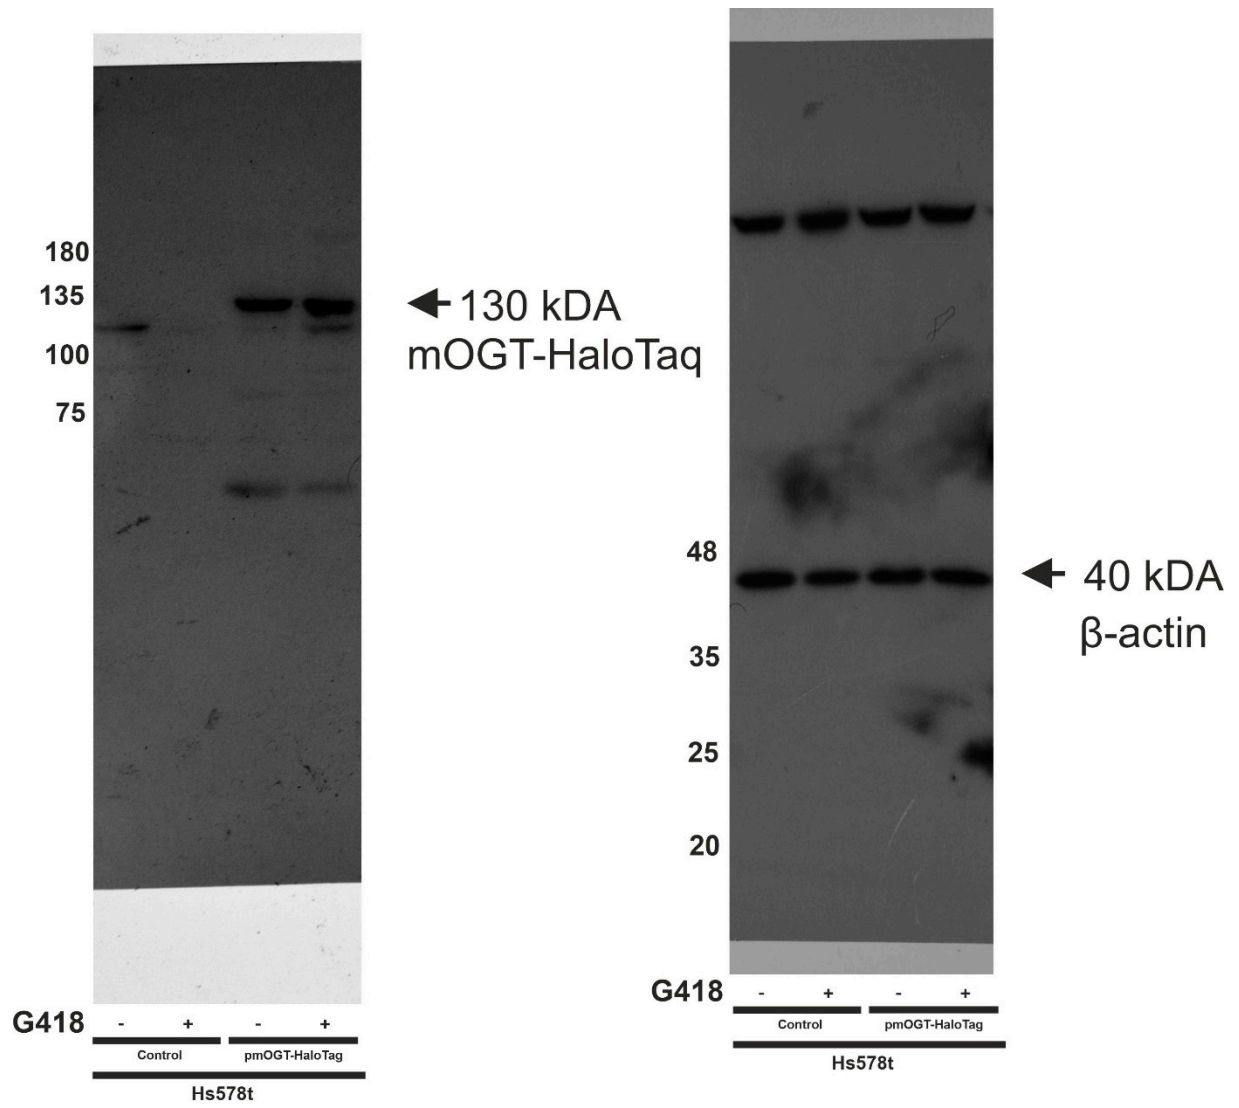

Figure 4A

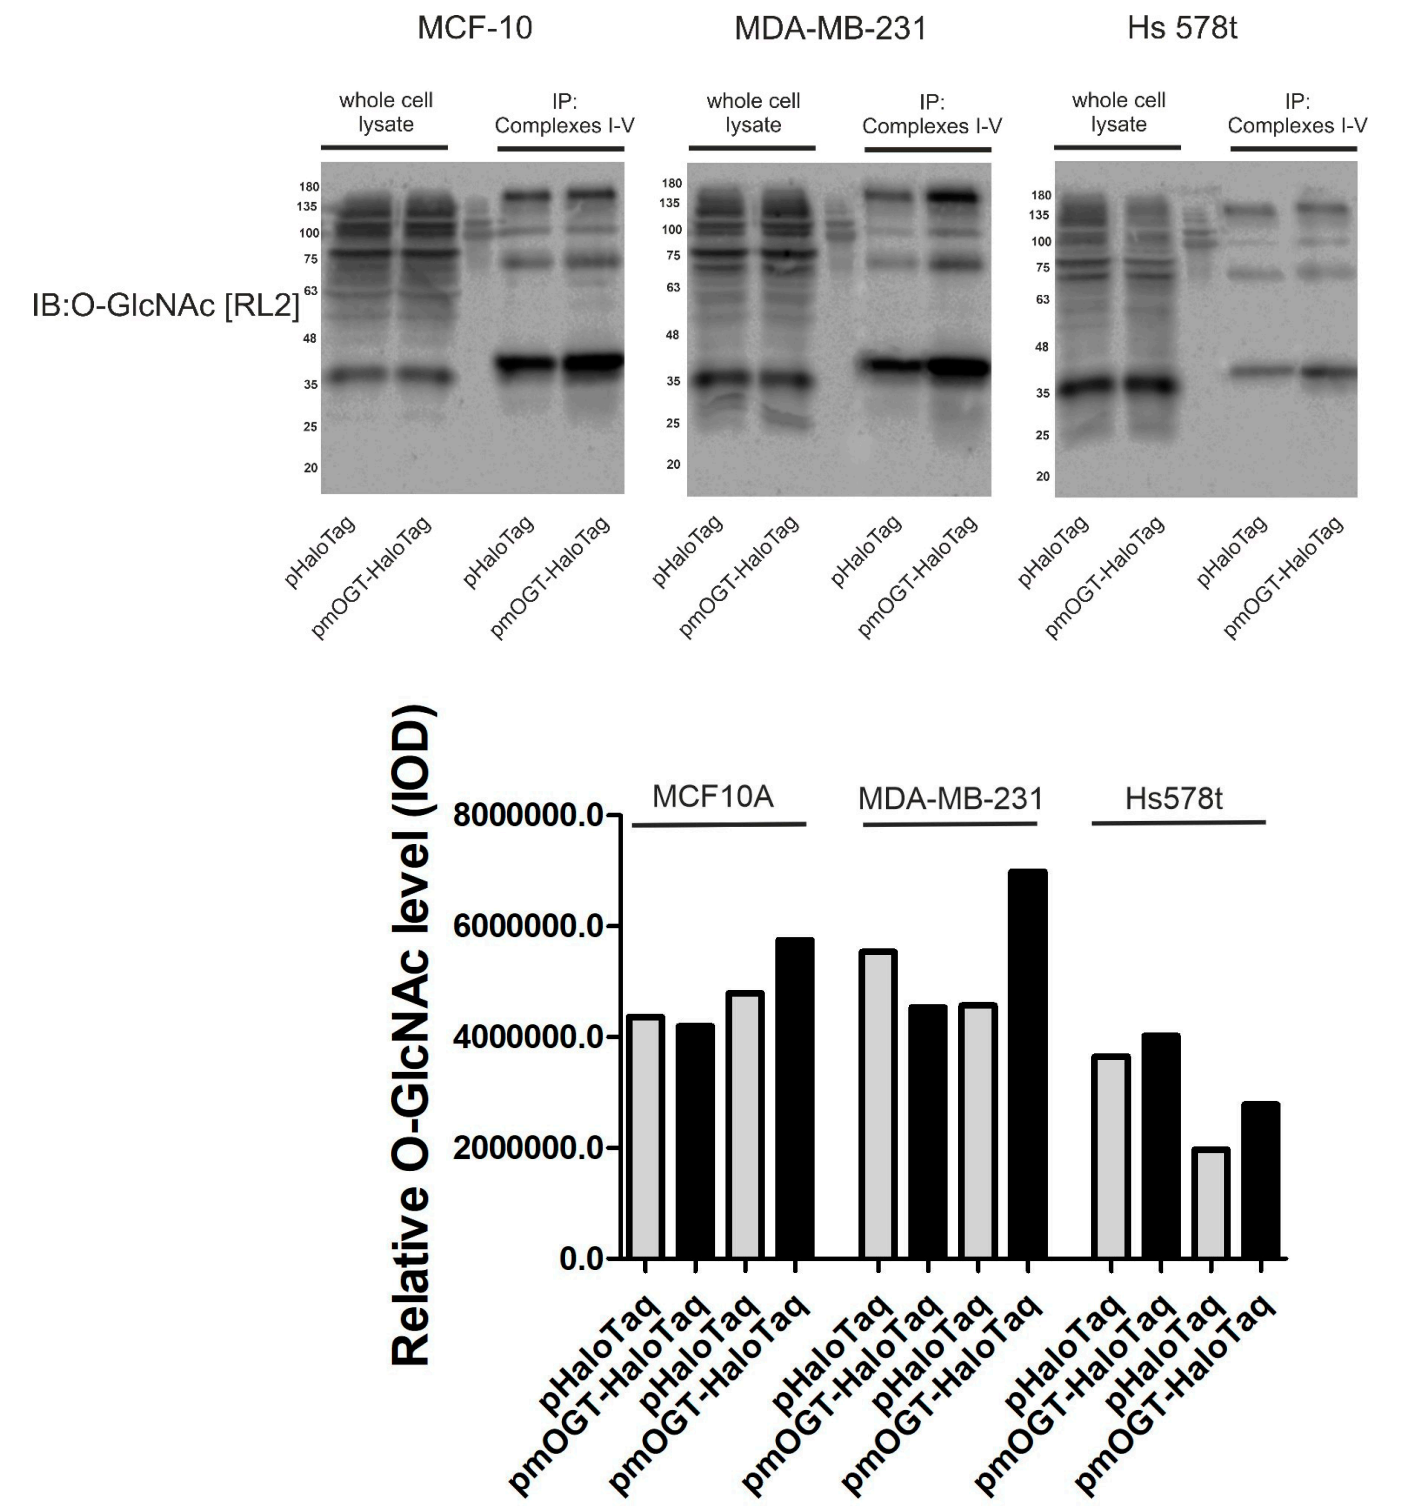



Figure 4B

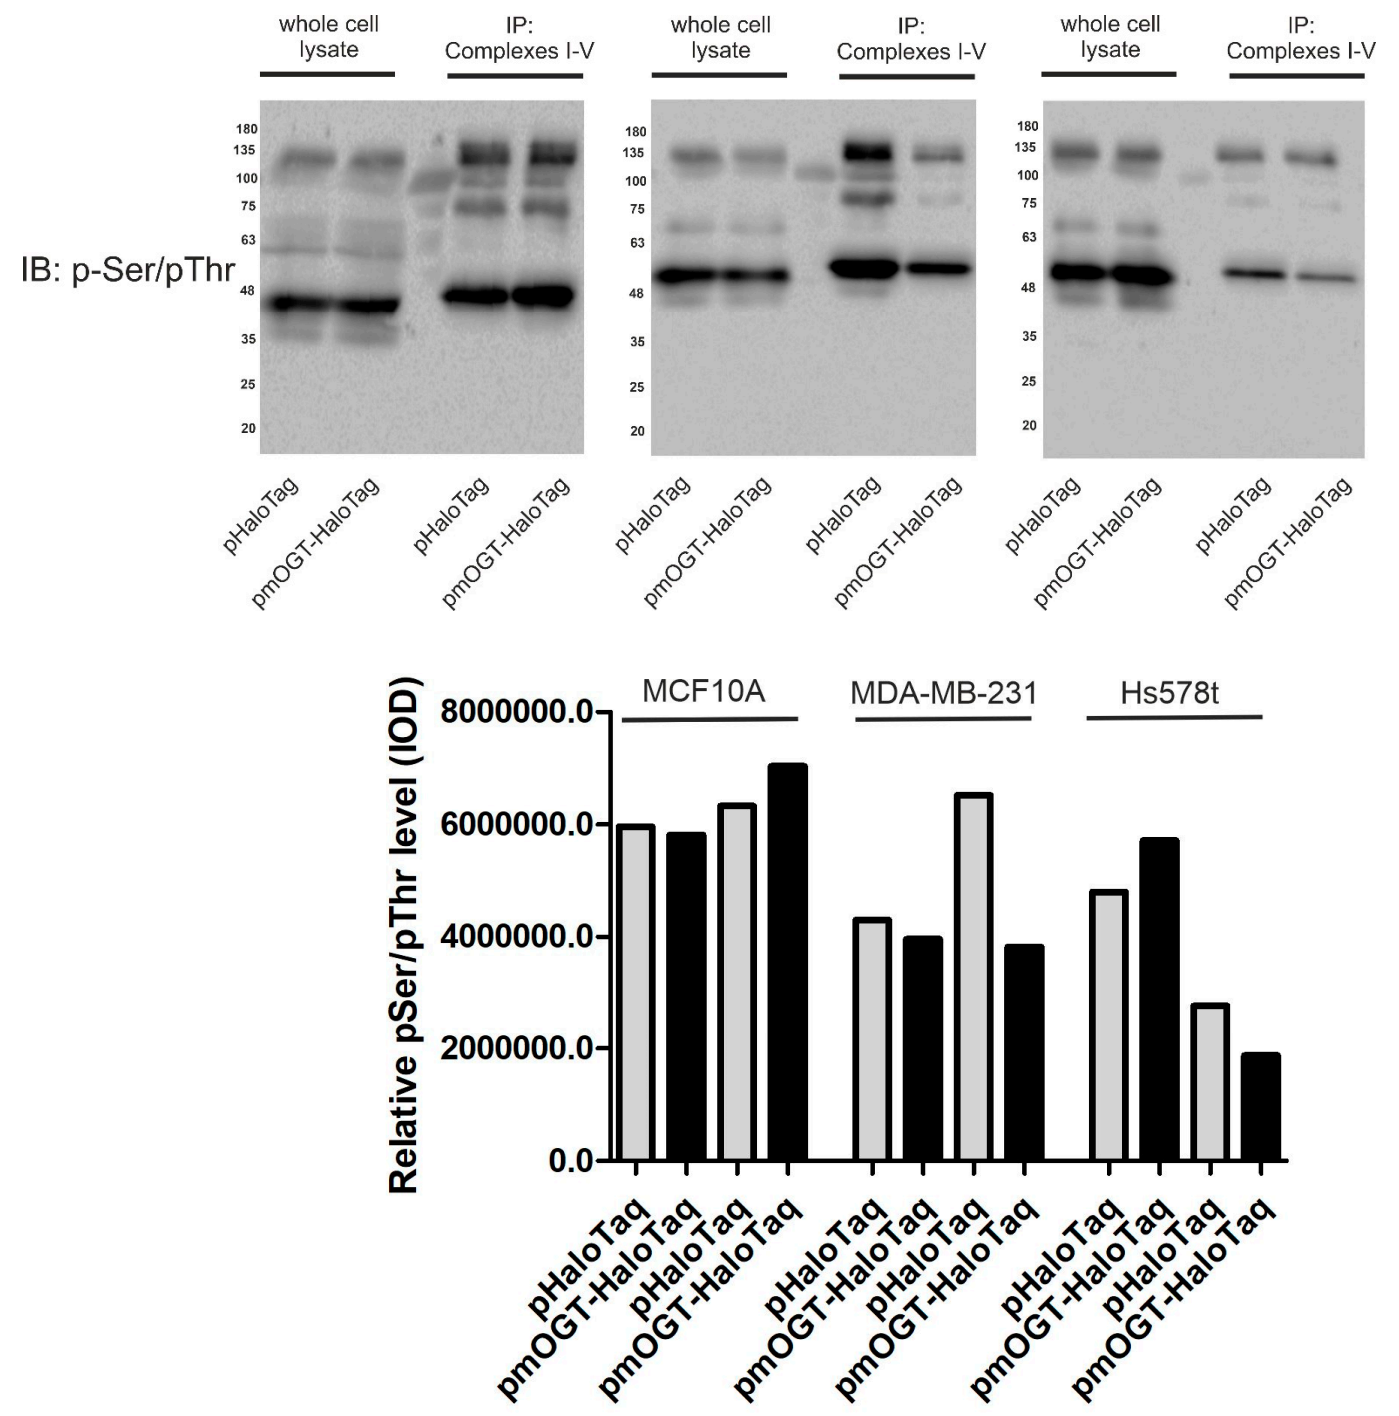

Figure 5Ba

MCF10A

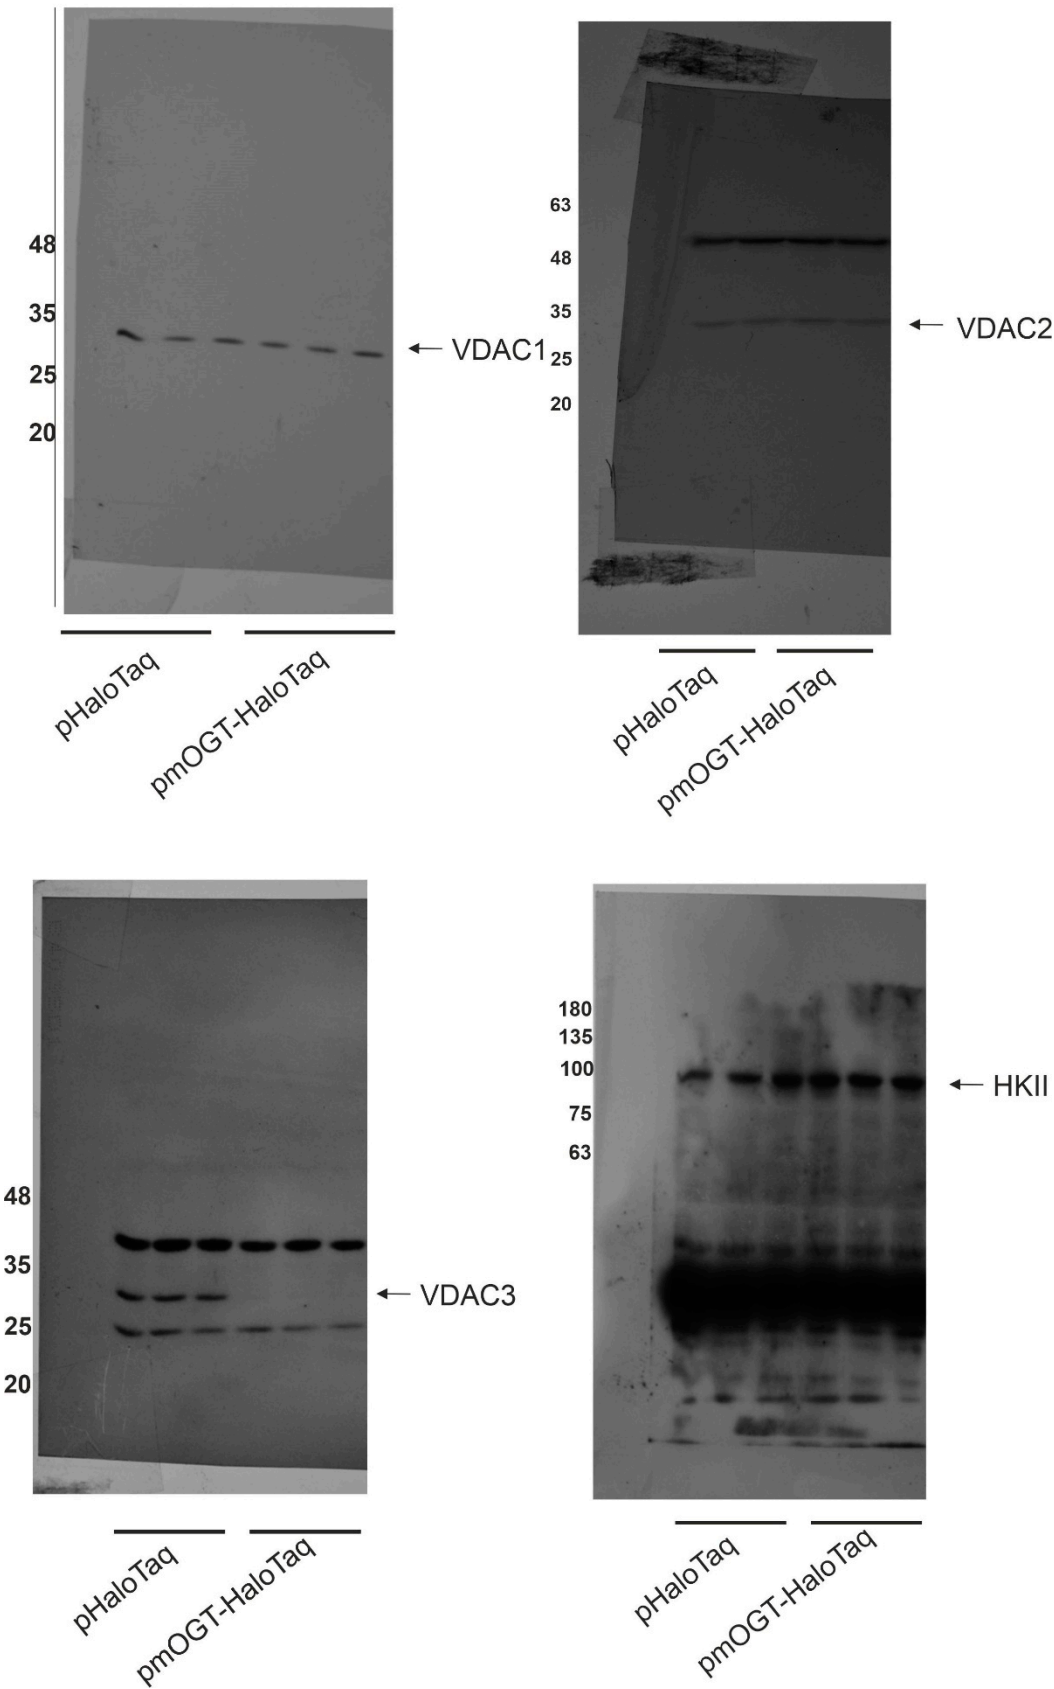



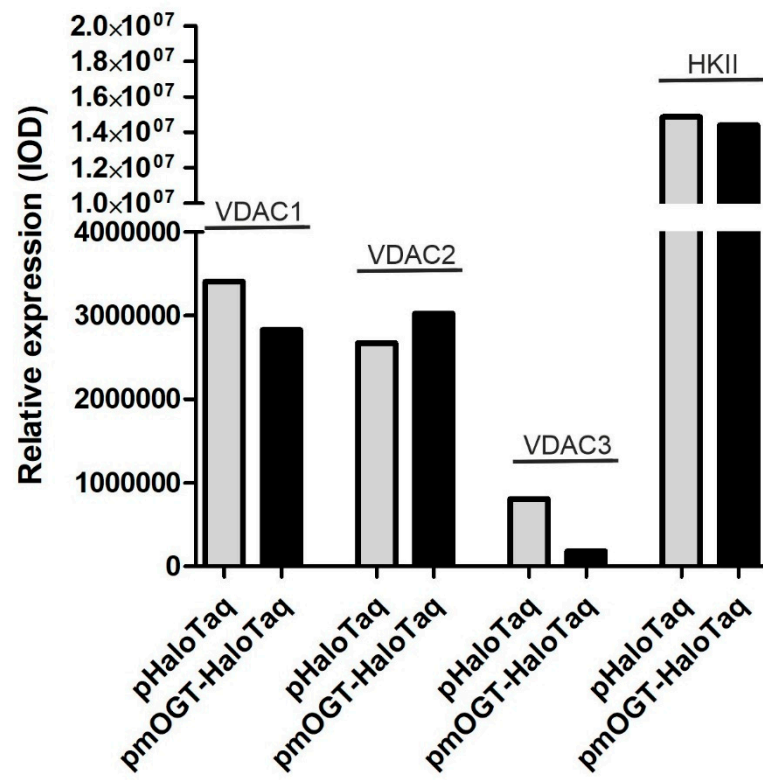

# MDA-MB-231

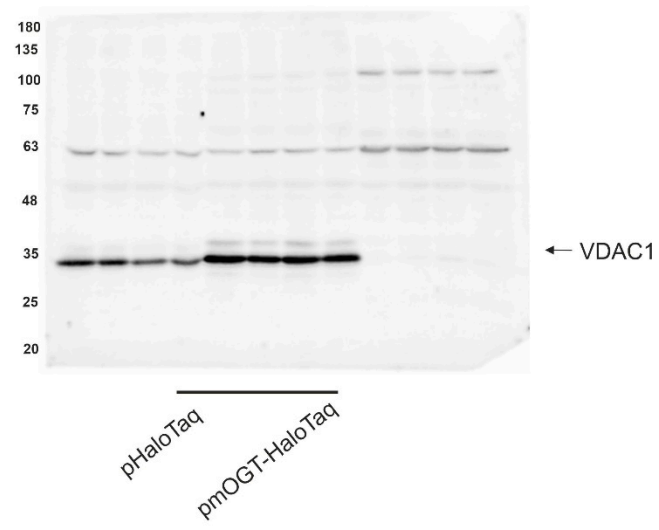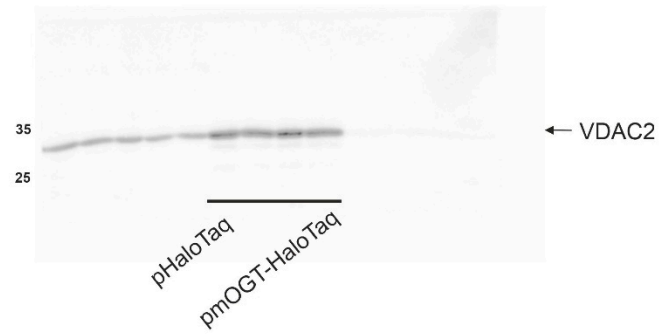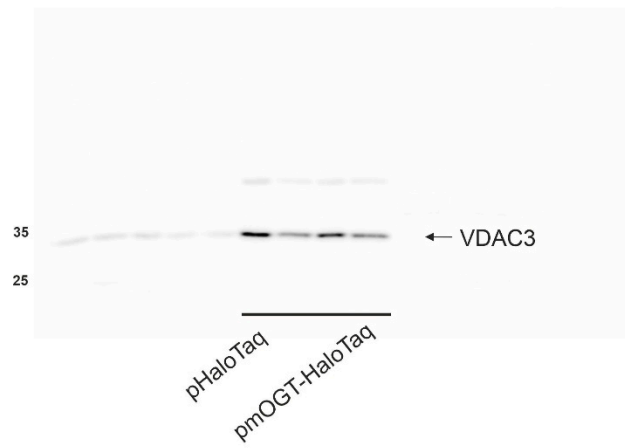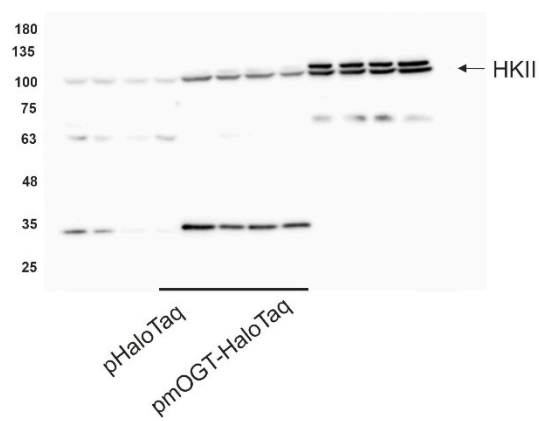

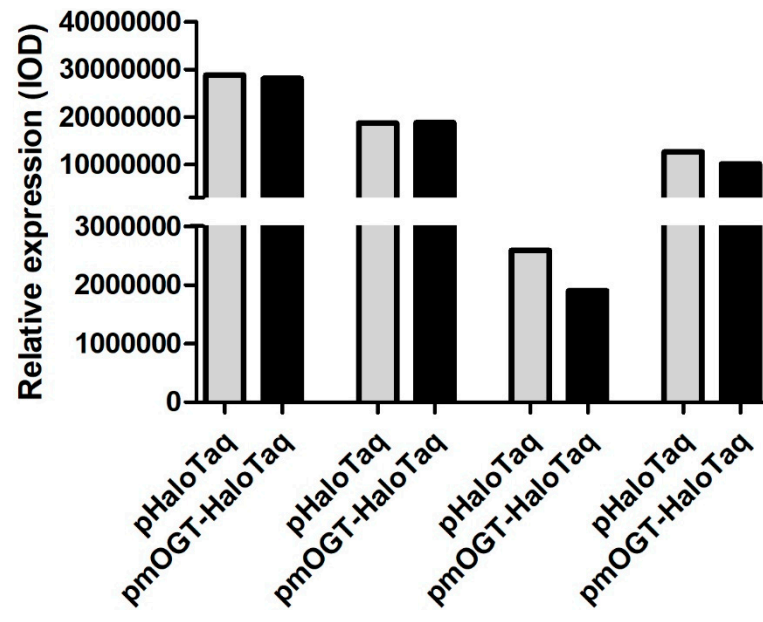

Hs578t

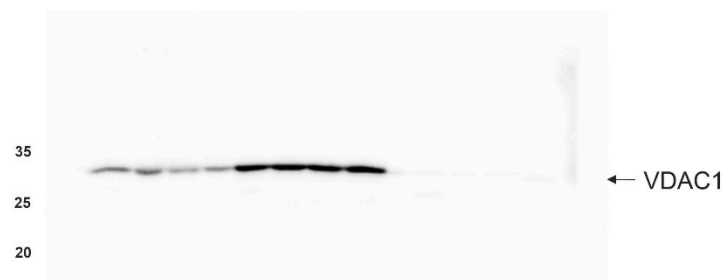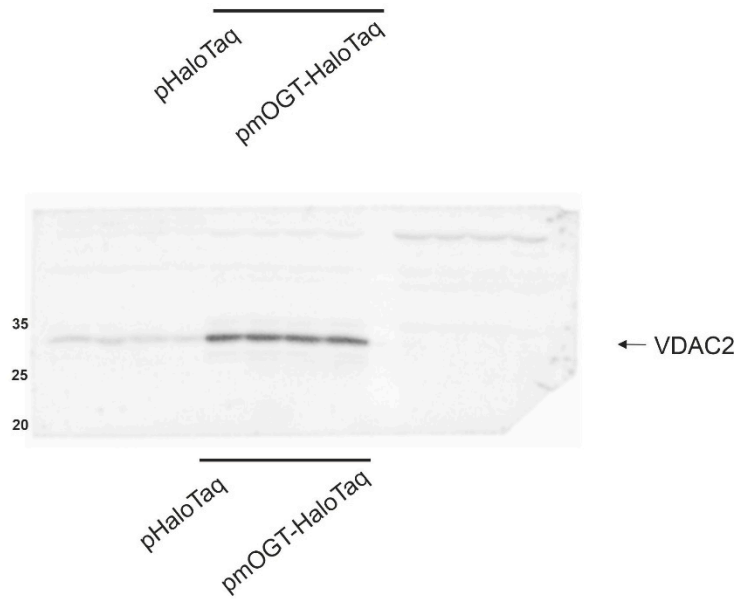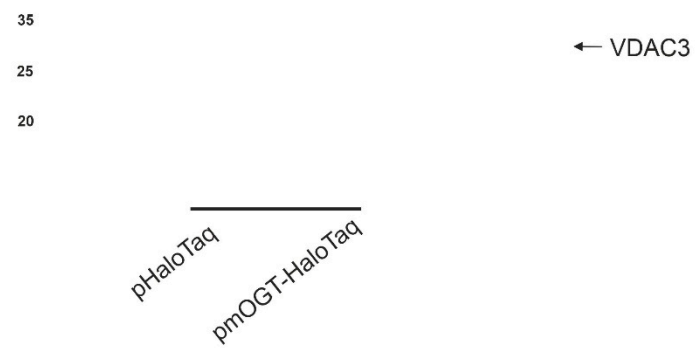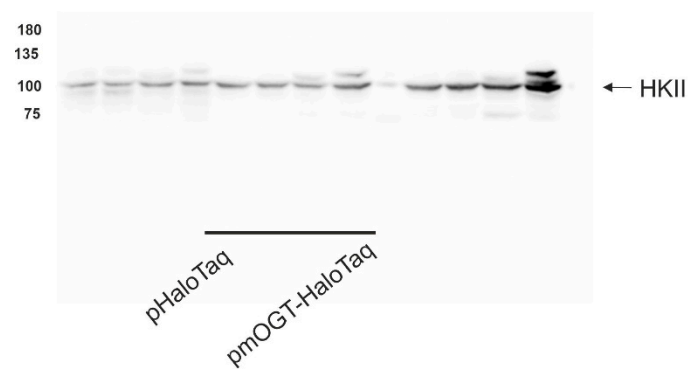

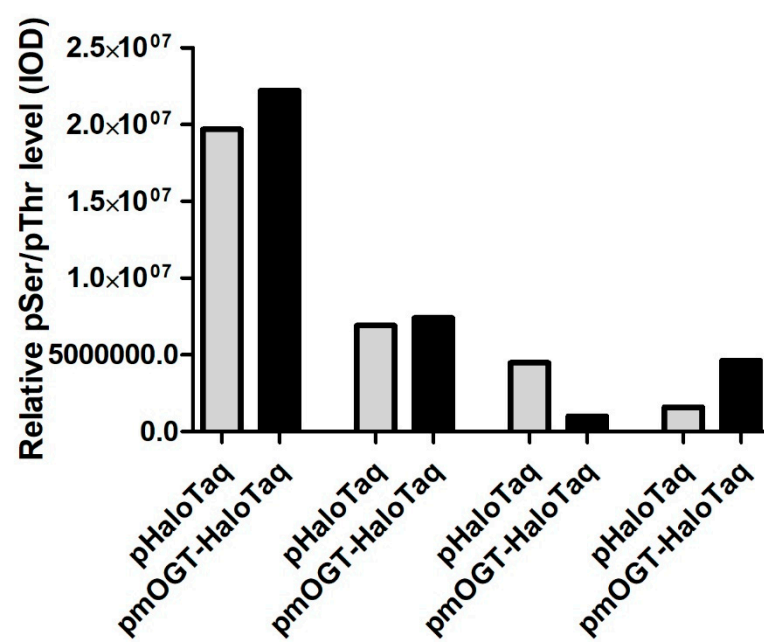

Figure 5Bb

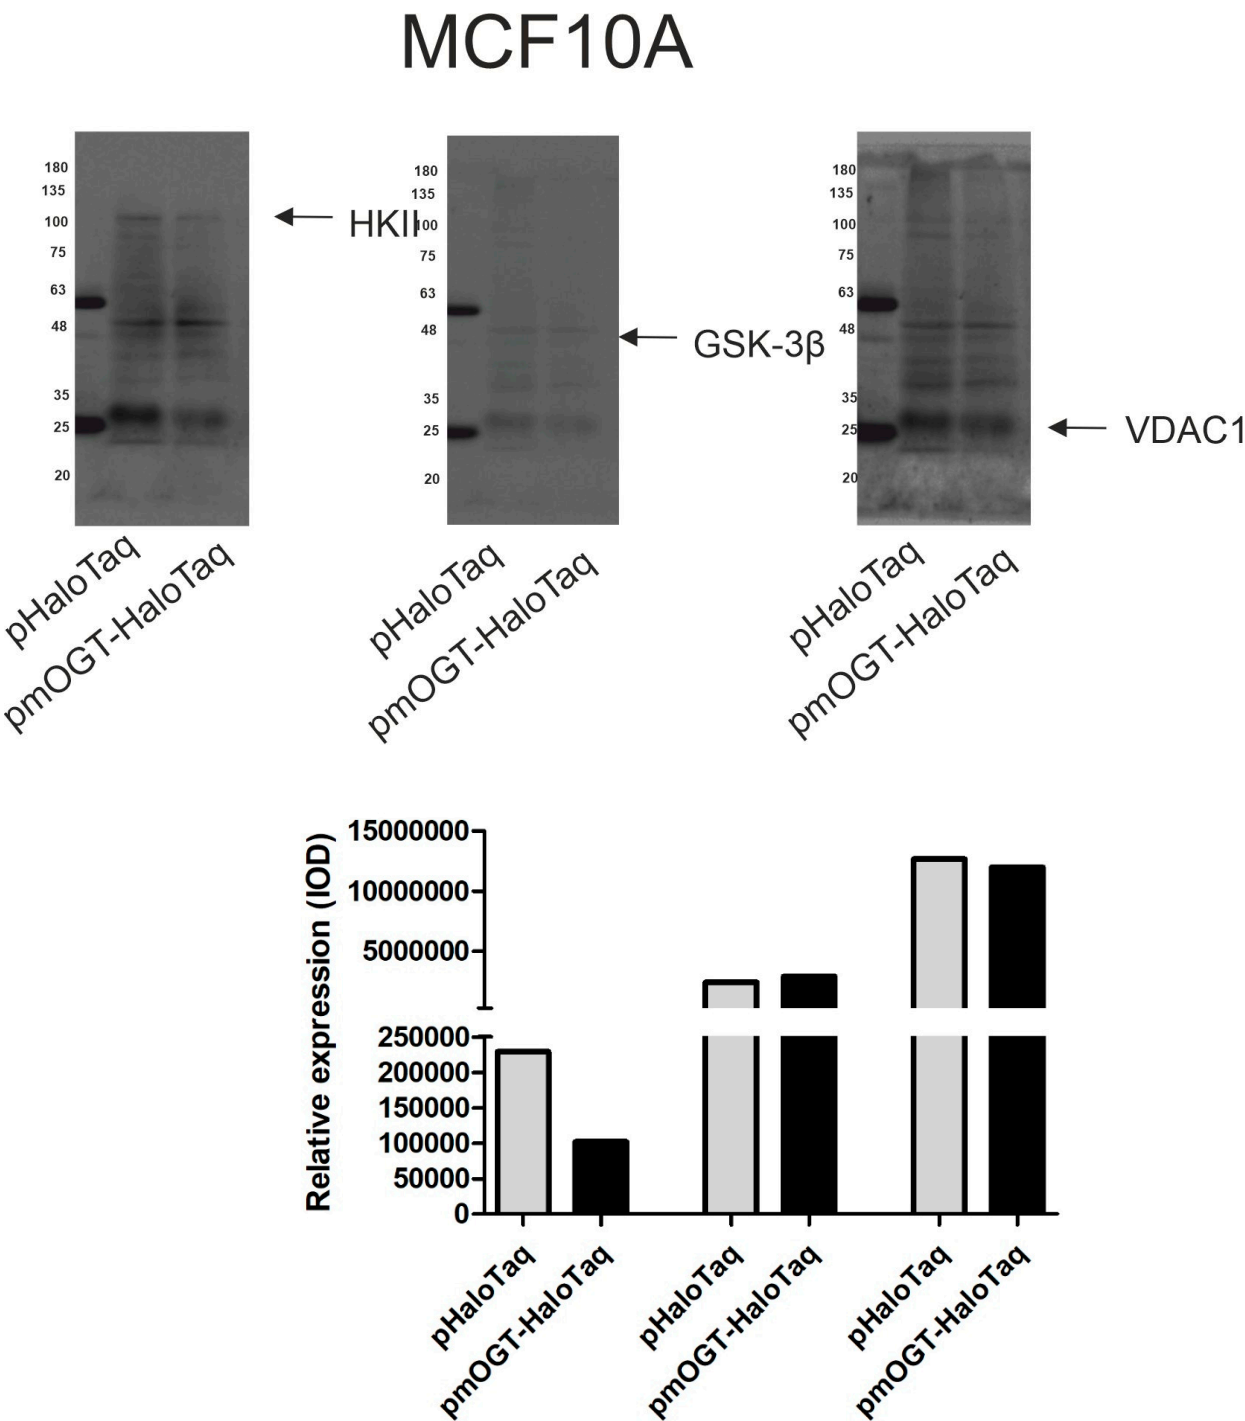



# MDA-MB-231

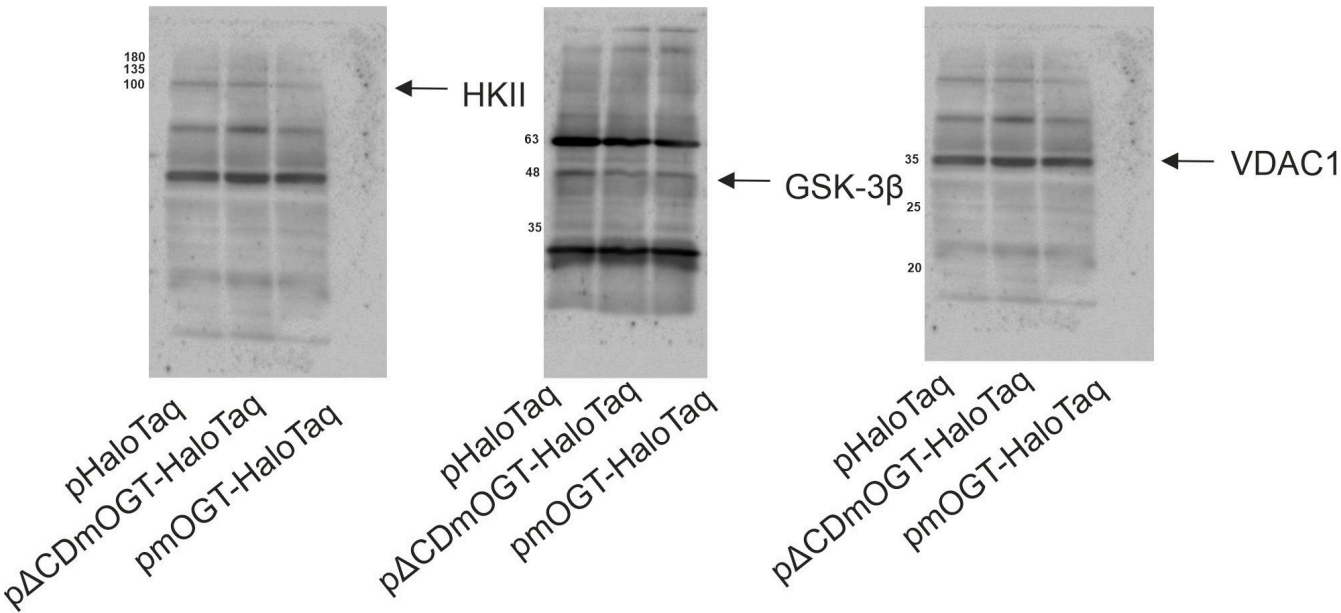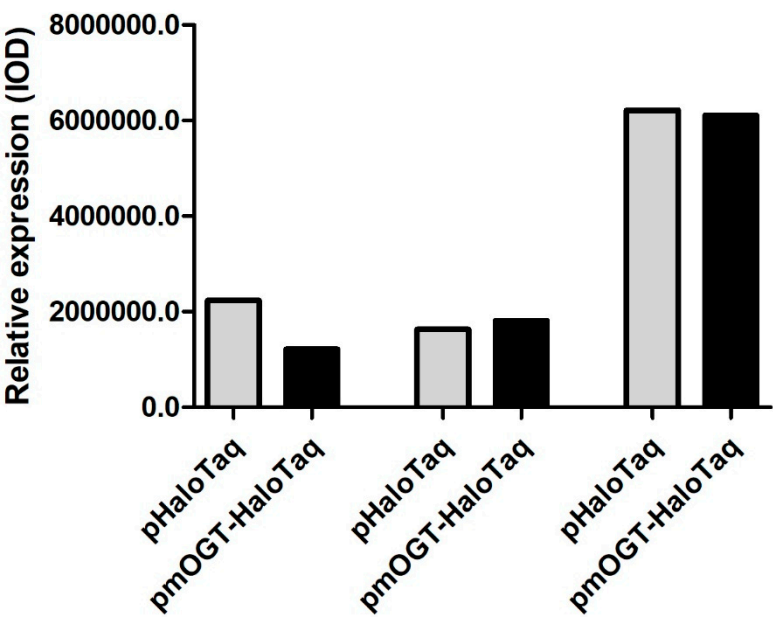

## Hs578t

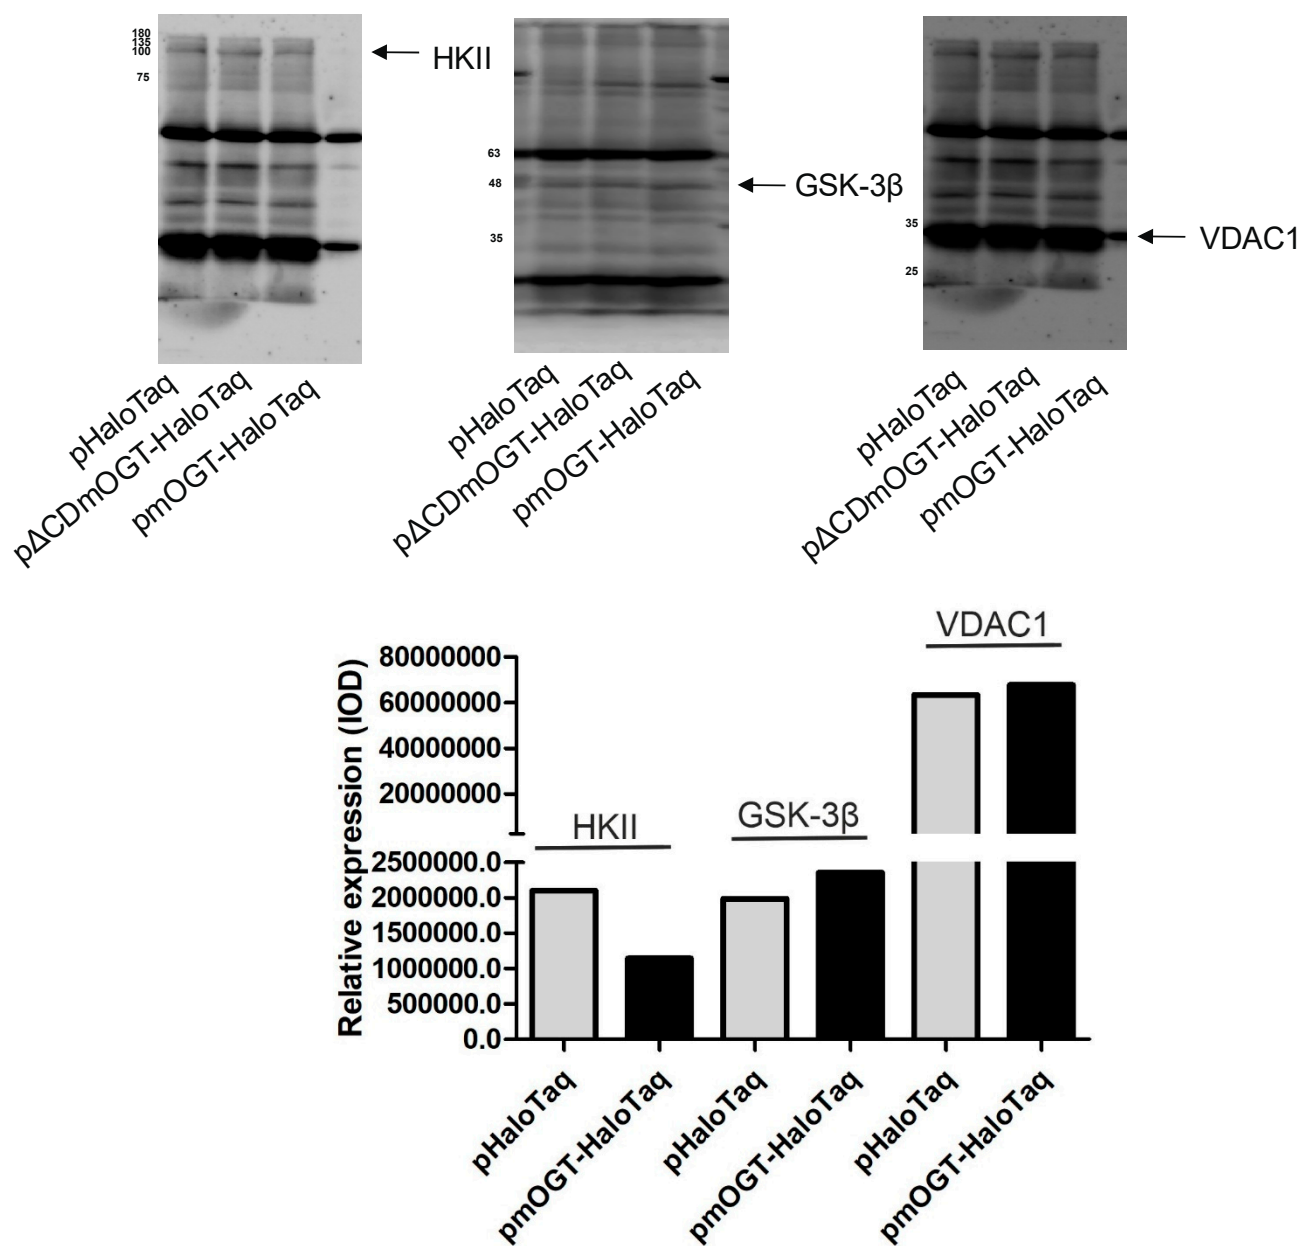

Figure S2. Uncropped original western blot figures.
