# Supplementary material for: Increased O-GlcNAcylation by Upregulation of Mitochondrial O-GlcNAc Transferase (mOGT) Inhibits the Activity of Respiratory Chain Complexes and Controls Cellular Bioenergetics
Source: Cancers (Basel). 2024 Mar 5;16(5):1048. doi: 10.3390/cancers16051048 (PMC10930986; doi:10.3390/cancers16051048)
Supplement: Supplementary file 1 [file cancers-16-01048-s001.zip › Supplementary Table S1_All identified mOGT ETC substrate candidates.xlsx]

## Sheet: Arkusz1
		Cell Line	Complex type	Gene Symbol	Accession	Description	Coverage	Peptides	Unique peptides	MW [kDa]	calc. pI	Is O-GlcNacylated?	oglcnac sites	phosphorylation sites	Biological Process	Cellular Component	Molecular Function
		MCF10A	COMPLEX I	ACAD9	Q9H845	Complex I assembly factor ACAD9, mitochondrial [OS=Homo sapiens]	77	15	15	68.7	7.96	Yes	S268;S302;S309	T478	cell organization and biogenesis;other metabolic processes	other membranes;mitochondrion;nucleus;other cell component	other molecular function
			COMPLEX I	MT-ND4	P03905	NADH-ubiquinone oxidoreductase chain 4 [OS=Homo sapiens]	46	10	10	51.5	9.35	Yes	-	-	cell organization and biogenesis;other metabolic processes;stress response;transport;developmental processes;other biological processes	other membranes;mitochondrion	transporter activity;other molecular function
			COMPLEX I	MT-ND5	P03915	NADH-ubiquinone oxidoreductase chain 5 [OS=Homo sapiens]	52	10	10	67	9.03	Yes	-	-	cell organization and biogenesis;other metabolic processes;stress response;transport;other biological processes	other membranes;mitochondrion;other cell component	transporter activity;other molecular function
			COMPLEX I	AIFM1	O95831	Apoptosis-inducing factor 1, mitochondrial [OS=Homo sapiens]	40	9	9	66.9	8.95	Yes	S60	T105;S116;S118;S268;S292;S371;T521;S524;S530	cell organization and biogenesis;stress response;transport;developmental processes;signal transduction;other biological processes	other membranes;cytosol;mitochondrion;nucleus;other cell component	nucleic acid binding activity;other molecular function
			COMPLEX I	NDUFV1	P49821	NADH dehydrogenase [ubiquinone] flavoprotein 1, mitochondrial [OS=Homo sapiens]	31	6	6	50.8	8.21	Yes	-	-	other metabolic processes;transport	other membranes;cytosol;mitochondrion	transporter activity;other molecular function
			COMPLEX I	NDUFA9	Q16795	NADH dehydrogenase [ubiquinone] 1 alpha subcomplex subunit 9, mitochondrial [OS=Homo sapiens]	37	6	6	42.5	9.8	Yes	-	-	cell organization and biogenesis;other metabolic processes;transport;other biological processes	other membranes;mitochondrion	transporter activity;other molecular function
			COMPLEX I	NDUFB10	O96000	NADH dehydrogenase [ubiquinone] 1 beta subcomplex subunit 10 [OS=Homo sapiens]	69	6	6	20.8	8.48	Yes	-	S145	cell organization and biogenesis;other metabolic processes;transport	other membranes;mitochondrion	transporter activity
			COMPLEX I	NDUFS3	O75489	NADH dehydrogenase [ubiquinone] iron-sulfur protein 3, mitochondrial [OS=Homo sapiens]	52	6	6	30.2	7.5	Yes	T21	-	cell organization and biogenesis;other metabolic processes;transport;other biological processes	other membranes;mitochondrion;nucleus	transporter activity;other molecular function
			COMPLEX I	NDUFAF1	Q9Y375	Complex I intermediate-associated protein 30, mitochondrial [OS=Homo sapiens]	45	5	5	37.7	7.64	-			cell organization and biogenesis;other metabolic processes	other membranes;cytosol;mitochondrion	other molecular function
			COMPLEX I	MT-ND1	P03886	NADH-ubiquinone oxidoreductase chain 1 [OS=Homo sapiens]	49	5	5	35.6	6.55	Yes	-	-	cell organization and biogenesis;other metabolic processes;transport	other membranes;mitochondrion	transporter activity
			COMPLEX I	NDUFS1	P28331	NADH-ubiquinone oxidoreductase 75 kDa subunit, mitochondrial [OS=Homo sapiens]	11	4	4	79.4	6.23	Yes	S259;S318	-	cell organization and biogenesis;other metabolic processes;transport;other biological processes	other membranes;mitochondrion	transporter activity;other molecular function
			COMPLEX I	NDUFB8	O95169	NADH dehydrogenase [ubiquinone] 1 beta subcomplex subunit 8, mitochondrial [OS=Homo sapiens]	51	4	4	21.8	6.8	Yes	T28	-	cell organization and biogenesis;other metabolic processes;transport	other membranes;mitochondrion;ER/Golgi	transporter activity
			COMPLEX I	NDUFS2	O75306	NADH dehydrogenase [ubiquinone] iron-sulfur protein 2, mitochondrial [OS=Homo sapiens]	21	4	4	52.5	7.55	Yes	-	-	cell cycle OR cell proliferation;cell organization and biogenesis;other metabolic processes;stress response;transport;developmental processes;other biological processes	other membranes;mitochondrion;nucleus	transporter activity;other molecular function
			COMPLEX I	NDUFAB1	O14561	Acyl carrier protein, mitochondrial [OS=Homo sapiens]	52	4	4	17.4	4.93	Yes	-	-	cell organization and biogenesis;protein metabolism;other metabolic processes	other membranes;cytosol;mitochondrion;nucleus	translation activity;other molecular function
			COMPLEX I	NUBPL	Q8TB37	Iron-sulfur protein NUBPL [OS=Homo sapiens]	30	4	4	34.1	9.04	-			cell organization and biogenesis;other metabolic processes	plasma membrane;other membranes;mitochondrion	other molecular function
			COMPLEX I	TMEM126B	Q8IUX1	Complex I assembly factor TMEM126B, mitochondrial [OS=Homo sapiens]	51	4	4	25.9	8.81	-			cell organization and biogenesis;other biological processes	other membranes;mitochondrion
			COMPLEX I	NDUFS8	O00217	NADH dehydrogenase [ubiquinone] iron-sulfur protein 8, mitochondrial [OS=Homo sapiens]	40	3	3	23.7	6.34	Yes	-	-	cell organization and biogenesis;other metabolic processes;stress response;transport	other membranes;mitochondrion	transporter activity;other molecular function
			COMPLEX I	NDUFB6	O95139	NADH dehydrogenase [ubiquinone] 1 beta subcomplex subunit 6 [OS=Homo sapiens]	38	3	3	15.5	9.63	Yes	-	-	cell organization and biogenesis;other metabolic processes;transport	other membranes;mitochondrion;nucleus	transporter activity
			COMPLEX I	TMEM126A	Q9H061	Transmembrane protein 126A [OS=Homo sapiens]	42	3	3	21.5	9.26	Yes	-	-	cell organization and biogenesis;developmental processes;signal transduction	plasma membrane;other membranes;mitochondrion
			COMPLEX I	NDUFC2	O95298	NADH dehydrogenase [ubiquinone] 1 subunit C2 [OS=Homo sapiens]	58	3	3	14.2	8.98	-			cell organization and biogenesis;other metabolic processes;transport;other biological processes	plasma membrane;other membranes;mitochondrion;other cytoplasmic organelle;other cell component	transporter activity
			COMPLEX I	NDUFB7	P17568	NADH dehydrogenase [ubiquinone] 1 beta subcomplex subunit 7 [OS=Homo sapiens]	39	3	3	16.4	8.92	Yes	-	S73	cell organization and biogenesis;other metabolic processes;transport	other membranes;mitochondrion	transporter activity
			COMPLEX I	TMEM70	Q9BUB7	Transmembrane protein 70, mitochondrial [OS=Homo sapiens]	27	3	3	29	8.91	-			cell organization and biogenesis	other membranes;mitochondrion;nucleus	other molecular function
			COMPLEX I	NDUFAF6	Q330K2	NADH dehydrogenase (ubiquinone) complex I, assembly factor 6 [OS=Homo sapiens]	26	3	3	38.2	9.36	-			cell organization and biogenesis;other metabolic processes	other membranes;mitochondrion;nucleus;other cell component
			COMPLEX I	NDUFAF7	Q7L592-2	Isoform 2 of Protein arginine methyltransferase NDUFAF7, mitochondrial [OS=Homo sapiens]	26	3	3	38	8.6	-
			COMPLEX I	NDUFA11	Q86Y39-2	Isoform 2 of NADH dehydrogenase [ubiquinone] 1 alpha subcomplex subunit 11 [OS=Homo sapiens]	45	3	3	23.4	8.82	-
			COMPLEX I	TIMMDC1	Q9NPL8	Complex I assembly factor TIMMDC1, mitochondrial [OS=Homo sapiens]	38	3	3	32.2	8.5	-				other membranes;mitochondrion;nucleus
			COMPLEX I	MT-ND3	P03897	NADH-ubiquinone oxidoreductase chain 3 [OS=Homo sapiens]	87	3	3	13.2	4.44	Yes	T35	-	other metabolic processes;stress response;transport;other biological processes	other membranes;mitochondrion	transporter activity
			COMPLEX I	NDUFS7	O75251-2	Isoform 2 of NADH dehydrogenase [ubiquinone] iron-sulfur protein 7, mitochondrial [OS=Homo sapiens]	29	2	2	22.2	9.88	-
			COMPLEX I	NDUFB5	O43674	NADH dehydrogenase [ubiquinone] 1 beta subcomplex subunit 5, mitochondrial [OS=Homo sapiens]	24	2	2	21.7	9.63	Yes	-	-	cell organization and biogenesis;other metabolic processes;transport	other membranes;mitochondrion;nucleus	transporter activity
			COMPLEX I	NDUFB3	O43676	NADH dehydrogenase [ubiquinone] 1 beta subcomplex subunit 3 [OS=Homo sapiens]	40	2	2	11.4	9.2	-			cell organization and biogenesis;other metabolic processes;transport	other membranes;mitochondrion	transporter activity
			COMPLEX I	NDUFAF2	Q8N183	NADH dehydrogenase [ubiquinone] 1 alpha subcomplex assembly factor 2 [OS=Homo sapiens]	25	2	2	19.8	8.97	Yes	S14;S144	S134	cell organization and biogenesis;other biological processes	other membranes;mitochondrion	other molecular function
			COMPLEX I	DMAC1	Q96GE9-2	Isoform 2 of Distal membrane-arm assembly complex protein 1 [OS=Homo sapiens]	62	2	2	11.8	9.92	-
			COMPLEX I	NDUFB1	O75438-2	Isoform 2 of NADH dehydrogenase [ubiquinone] 1 beta subcomplex subunit 1 [OS=Homo sapiens]	38	2	2	11.9	8.73	-
			COMPLEX I	NDUFB2	O95178	NADH dehydrogenase [ubiquinone] 1 beta subcomplex subunit 2, mitochondrial [OS=Homo sapiens]	31	1	1	12.1	5.74	-			cell organization and biogenesis;other metabolic processes;transport	other membranes;mitochondrion	transporter activity
			COMPLEX I	NDUFA1	O15239	NADH dehydrogenase [ubiquinone] 1 alpha subcomplex subunit 1 [OS=Homo sapiens]	49	1	1	8.1	8.84	Yes	-	-	cell organization and biogenesis;other metabolic processes;transport	other membranes;mitochondrion	transporter activity
			COMPLEX II	SDHB	P21912	Succinate dehydrogenase [ubiquinone] iron-sulfur subunit, mitochondrial [OS=Homo sapiens]	39	4	4	31.6	8.76	Yes	T35	-	other metabolic processes	plasma membrane;other membranes;mitochondrion;nucleus	other molecular function
			COMPLEX II	SDHA	P31040	Succinate dehydrogenase [ubiquinone] flavoprotein subunit, mitochondrial [OS=Homo sapiens]	18	4	4	72.6	7.39	Yes	T348	T215	other metabolic processes;developmental processes	other membranes;mitochondrion;nucleus	other molecular function
			COMPLEX II	SDHC	Q99643-4	Isoform 4 of Succinate dehydrogenase cytochrome b560 subunit, mitochondrial [OS=Homo sapiens]	68	3	2	12.8	9.19	-
			COMPLEX II	SDHAF2	Q9NX18	Succinate dehydrogenase assembly factor 2, mitochondrial [OS=Homo sapiens]	59	3	3	19.6	6.8	Yes	-	-	cell organization and biogenesis;protein metabolism;other metabolic processes;other biological processes	cytosol;mitochondrion;nucleus
			COMPLEX III	UQCRC2	P22695	Cytochrome b-c1 complex subunit 2, mitochondrial [OS=Homo sapiens]	61	9	9	48.4	8.63	Yes	S367;T369	-	protein metabolism;other metabolic processes	other membranes;mitochondrion;nucleus	other molecular function
			COMPLEX III	BCS1L	Q9Y276	Mitochondrial chaperone BCS1 [OS=Homo sapiens]	42	8	8	47.5	8.5	Yes	-	T181	cell organization and biogenesis;transport	other membranes;mitochondrion	other molecular function
			COMPLEX III	CYC1	P08574	Cytochrome c1, heme protein, mitochondrial [OS=Homo sapiens]	40	6	6	35.4	9	Yes	-	S182	other metabolic processes;transport;other biological processes	other membranes;mitochondrion	transporter activity;other molecular function
			COMPLEX III	UQCRC1	P31930	Cytochrome b-c1 complex subunit 1, mitochondrial [OS=Homo sapiens]	34	6	6	52.6	6.37	Yes	-	S212	other metabolic processes;transport;other biological processes	other membranes;mitochondrion	transporter activity;other molecular function
			COMPLEX III	UQCC3	Q6UW78	Ubiquinol-cytochrome-c reductase complex assembly factor 3 [OS=Homo sapiens]	100	5	5	10.1	9.41	-			cell organization and biogenesis;other metabolic processes	other membranes;cytosol;mitochondrion;nucleus	other molecular function
			COMPLEX III	UQCC1	Q9NVA1-4	Isoform 4 of Ubiquinol-cytochrome-c reductase complex assembly factor 1 [OS=Homo sapiens]	21	3	3	31.3	8.92	-
			COMPLEX III	TTC19	Q6DKK2	Tetratricopeptide repeat protein 19, mitochondrial [OS=Homo sapiens]	22	3	3	42.4	5.77	-			cell cycle OR cell proliferation;cell organization and biogenesis	other membranes;cytoskeleton;mitochondrion;other cell component
			COMPLEX III	UQCRB	P14927	Cytochrome b-c1 complex subunit 7 [OS=Homo sapiens]	34	2	2	13.5	8.78	Yes	-	-	other metabolic processes;transport	other membranes;mitochondrion
			COMPLEX III	UQCC2	Q9BRT2	Ubiquinol-cytochrome-c reductase complex assembly factor 2 [OS=Homo sapiens]	42	2	2	14.9	7.37	Yes	-	-	cell organization and biogenesis;other biological processes	other membranes;mitochondrion;nucleus
			COMPLEX III	UQCR10	Q9UDW1	Cytochrome b-c1 complex subunit 9 [OS=Homo sapiens]	56	1	1	7.3	9.47	Yes	-	-	other metabolic processes;transport	other membranes;mitochondrion	transporter activity
			COMPLEX III	UQCR11	O14957	Cytochrome b-c1 complex subunit 10 [OS=Homo sapiens]	54	1	1	6.6	9.88	-			other metabolic processes	other membranes;mitochondrion	other molecular function
			COMPLEX IV	COX10	Q12887	Protoheme IX farnesyltransferase, mitochondrial [OS=Homo sapiens]	37	8	8	48.9	9.19	-			cell organization and biogenesis;other metabolic processes	other membranes;cytosol;mitochondrion;nucleus;other cell component	other molecular function
			COMPLEX IV	COA7	Q96BR5	Cytochrome c oxidase assembly factor 7 [OS=Homo sapiens]	100	8	8	25.7	6.02	Yes	-	-		mitochondrion;nucleus
			COMPLEX IV	TACO1	Q9BSH4	Translational activator of cytochrome c oxidase 1 [OS=Homo sapiens]	51	7	7	32.5	8.13	Yes	S2	-	cell organization and biogenesis;other biological processes	mitochondrion	translation activity;nucleic acid binding activity
			COMPLEX IV	HIGD1A	Q9Y241-2	Isoform 2 of HIG1 domain family member 1A, mitochondrial [OS=Homo sapiens]	100	7	7	11.8	9.44	-
			COMPLEX IV	SURF1	Q15526	Surfeit locus protein 1 [OS=Homo sapiens]	56	6	6	33.3	9.6	-			cell organization and biogenesis;other metabolic processes;transport	other membranes;mitochondrion	transporter activity
			COMPLEX IV	COX15	Q7KZN9	Cytochrome c oxidase assembly protein COX15 homolog [OS=Homo sapiens]	35	5	5	46	9.82	Yes	-	-	cell organization and biogenesis;other metabolic processes;transport;other biological processes	other membranes;mitochondrion;nucleus;other cell component	transporter activity;other molecular function
			COMPLEX IV	SMIM20	Q8N5G0	Small integral membrane protein 20 [OS=Homo sapiens]	100	5	5	7.7	9.86	-			cell organization and biogenesis	non-structural extracellular;other membranes;mitochondrion
			COMPLEX IV	PNKD	Q8N490-2	Isoform 2 of Probable hydrolase PNKD [OS=Homo sapiens]	60	4	4	15.4	10.58	-
			COMPLEX IV	COX5B	P10606	Cytochrome c oxidase subunit 5B, mitochondrial [OS=Homo sapiens]	84	3	3	13.7	8.81	-			other metabolic processes;transport;other biological processes	other membranes;mitochondrion	transporter activity;other molecular function
			COMPLEX IV	SCO2	O43819	Protein SCO2 homolog, mitochondrial [OS=Homo sapiens]	24	3	3	29.8	8.85	Yes	-	-	cell organization and biogenesis;other metabolic processes;developmental processes;other biological processes	other membranes;cytoskeleton;mitochondrion	other molecular function
			COMPLEX IV	NDUFA4	O00483	Cytochrome c oxidase subunit NDUFA4 [OS=Homo sapiens]	100	3	3	9.4	9.38	Yes	-	S66	other metabolic processes;transport;other biological processes	other membranes;mitochondrion	transporter activity;other molecular function
			COMPLEX IV	COA3	Q9Y2R0	Cytochrome c oxidase assembly factor 3 homolog, mitochondrial [OS=Homo sapiens]	91	3	3	11.7	9.6	-			cell organization and biogenesis;other biological processes	other membranes;mitochondrion
			COMPLEX IV	COX4I2	Q96KJ9	Cytochrome c oxidase subunit 4 isoform 2, mitochondrial [OS=Homo sapiens]	37	3	3	20	9.63	Yes	-	-	other metabolic processes;transport	other membranes;mitochondrion	transporter activity
			COMPLEX IV	PET117	Q6UWS5	Protein PET117 homolog, mitochondrial [OS=Homo sapiens]	92	3	3	9.2	10.1	-			cell organization and biogenesis	mitochondrion
			COMPLEX IV	COX6A1	P12074	Cytochrome c oxidase subunit 6A1, mitochondrial [OS=Homo sapiens]	33	2	2	12.1	9.32	-			other metabolic processes	other membranes;mitochondrion	enzyme regulator activity;other molecular function
			COMPLEX IV	COX7C	P15954	Cytochrome c oxidase subunit 7C, mitochondrial [OS=Homo sapiens]	70	2	2	7.2	10.27	-			other metabolic processes;transport	other membranes;mitochondrion
			COMPLEX IV	PET100	P0DJ07	Protein PET100 homolog, mitochondrial [OS=Homo sapiens]	79	2	2	9.1	6.77	-			cell organization and biogenesis	other membranes;mitochondrion	other molecular function
			COMPLEX IV	COX6B1	P14854	Cytochrome c oxidase subunit 6B1 [OS=Homo sapiens]	22	1	1	10.2	7.05	Yes	-	-	other metabolic processes;transport	other membranes;mitochondrion	transporter activity
			COMPLEX IV	COX4I1	P13073	Cytochrome c oxidase subunit 4 isoform 1, mitochondrial [OS=Homo sapiens]	20	1	1	19.6	9.51	Yes	-	S56;S58	other metabolic processes;transport	other membranes;cytosol;mitochondrion;nucleus	transporter activity
			COMPLEX IV	CMC1	Q7Z7K0	COX assembly mitochondrial protein homolog [OS=Homo sapiens]	26	1	1	12.5	8.63	-				mitochondrion	other molecular function
			COMPLEX IV	COX14	Q96I36	Cytochrome c oxidase assembly protein COX14 [OS=Homo sapiens]	58	1	1	6.6	9.55	Yes	-	-	cell organization and biogenesis	other membranes;mitochondrion
			COMPLEX IV	COA5	Q86WW8	Cytochrome c oxidase assembly factor 5 [OS=Homo sapiens]	49	1	1	8.4	8.68	-			cell organization and biogenesis	mitochondrion
			COMPLEX IV	COX16	Q9P0S2	Cytochrome c oxidase assembly protein COX16 homolog, mitochondrial [OS=Homo sapiens]	29	1	1	12.3	9.5	-			cell organization and biogenesis	other membranes;mitochondrion
			COMPLEX IV	COX8A	P10176	Cytochrome c oxidase subunit 8A, mitochondrial [OS=Homo sapiens]	46	1	1	7.6	10.24	-			other metabolic processes;transport	other membranes;mitochondrion	transporter activity
			COMPLEX IV	COA4	Q9NYJ1	Cytochrome c oxidase assembly factor 4 homolog, mitochondrial [OS=Homo sapiens]	24	1	1	10.1	6.04	-			cell organization and biogenesis	mitochondrion
			COMPLEX IV	COX7B2	Q8TF08	Cytochrome c oxidase subunit 7B2, mitochondrial [OS=Homo sapiens]	43	1	1	9.1	9.72	-			other metabolic processes;other biological processes	other membranes;mitochondrion
			COMPLEX V	ATPAF1	Q5TC12	ATP synthase mitochondrial F1 complex assembly factor 1 [OS=Homo sapiens]	96	11	11	36.4	7.96	Yes	-	-	cell organization and biogenesis	mitochondrion
			COMPLEX V	DMAC2L	Q99766	ATP synthase subunit s, mitochondrial [OS=Homo sapiens]	74	6	6	24.9	7.56	-			other metabolic processes;transport	other membranes;mitochondrion;other cell component	transporter activity;other molecular function
			COMPLEX V	ATP5F1B	P06576	ATP synthase subunit beta, mitochondrial [OS=Homo sapiens]	16	4	4	56.5	5.4	Yes	S327	T312;S415;S433;S529	other metabolic processes;transport;developmental processes;other biological processes	plasma membrane;other membranes;mitochondrion;other cell component	signal transduction activity or receptor binding;transporter activity;other molecular function
			COMPLEX V	ATP5MG	O75964	ATP synthase subunit g, mitochondrial [OS=Homo sapiens]	98	4	4	11.4	9.64	-			other metabolic processes;transport	other membranes;mitochondrion	transporter activity
			COMPLEX V	ATP5MC1	P05496	ATP synthase F(0) complex subunit C1, mitochondrial [OS=Homo sapiens]	94	4	4	14.3	9.74	-			other metabolic processes;transport	other membranes;mitochondrion	transporter activity;other molecular function
			COMPLEX V	ATP5MC2	Q06055	ATP synthase F(0) complex subunit C2, mitochondrial [OS=Homo sapiens]	93	4	3	14.6	9.06	Yes	-	-	other metabolic processes;transport	other membranes;mitochondrion	transporter activity;other molecular function
			COMPLEX V	ATP5PO	P48047	ATP synthase subunit O, mitochondrial [OS=Homo sapiens]	31	3	3	23.3	9.96	Yes	-	-	other metabolic processes;transport	plasma membrane;other membranes;mitochondrion	transporter activity
			COMPLEX V	TMEM70	Q9BUB7	Transmembrane protein 70, mitochondrial [OS=Homo sapiens]	27	3	3	29	8.91	-			cell organization and biogenesis	other membranes;mitochondrion;nucleus	other molecular function
			COMPLEX V	ATP5MF	P56134-3	Isoform 3 of ATP synthase subunit f, mitochondrial [OS=Homo sapiens]	100	3	3	6.3	8.88	-
			COMPLEX V	ATP5PF	P18859	ATP synthase-coupling factor 6, mitochondrial [OS=Homo sapiens]	38	2	2	12.6	9.52	-			other metabolic processes;transport	other membranes;mitochondrion	transporter activity
			COMPLEX V	ATPAF2	Q8N5M1	ATP synthase mitochondrial F1 complex assembly factor 2 [OS=Homo sapiens]	22	2	2	32.8	7.09	Yes	S237	-	cell organization and biogenesis	cytosol;mitochondrion;nucleus
			COMPLEX V	ATP5PB	P24539	ATP synthase F(0) complex subunit B1, mitochondrial [OS=Homo sapiens]	27	2	2	28.9	9.36	Yes	-	-	other metabolic processes;transport	other membranes;mitochondrion	transporter activity
			COMPLEX V	ATP5MC3	P48201	ATP synthase F(0) complex subunit C3, mitochondrial [OS=Homo sapiens]	44	2	1	14.7	9.45	Yes	-	-	other metabolic processes;transport	other membranes;mitochondrion	transporter activity;other molecular function
			COMPLEX V	MT-ATP8	P03928	ATP synthase protein 8 [OS=Homo sapiens]	80	2	2	8	9.91	-			other metabolic processes;transport	other membranes;mitochondrion	transporter activity
			COMPLEX V	ATP5F1D	P30049	ATP synthase subunit delta, mitochondrial [OS=Homo sapiens]	21	1	1	17.5	5.49	Yes	-	-	cell organization and biogenesis;other metabolic processes;transport;other biological processes	other membranes;mitochondrion	transporter activity
			COMPLEX V	MT-ATP6	P00846	ATP synthase subunit a [OS=Homo sapiens]	15	1	1	24.8	10.1	Yes	-	-	other metabolic processes;stress response;transport	other membranes;mitochondrion	transporter activity
			COMPLEX V	ATPSCKMT	Q6P4H8	ATP synthase subunit C lysine N-methyltransferase [OS=Homo sapiens]	14	1	1	26.1	8.87	-			cell organization and biogenesis;protein metabolism;other metabolic processes;other biological processes	other membranes;mitochondrion	other molecular function
		MDA-MB-231	COMPLEX I	NDUFS7	O75251	NADH dehydrogenase [ubiquinone] iron-sulfur protein 7, mitochondrial [OS=Homo sapiens]	100	9	9	23.5	23.5	Yes			cell organization and biogenesis;other metabolic processes;transport	plasma membrane;other membranes;mitochondrion;other cell component	transporter activity;other molecular function
			COMPLEX I	AIFM1	O95831	Apoptosis-inducing factor 1, mitochondrial [OS=Homo sapiens]	38	7	7	66.9	66.9	Yes	T328	S37	cell organization and biogenesis;stress response;transport;developmental processes;signal transduction;other biological processes	other membranes;cytosol;mitochondrion;nucleus;other cell component	nucleic acid binding activity;other molecular function
			COMPLEX I	ACAD9	Q9H845	Complex I assembly factor ACAD9, mitochondrial [OS=Homo sapiens]	26	5	5	68.7	68.7	Yes		T156;T347;S366;T369;S373;S375	cell organization and biogenesis;other metabolic processes	other membranes;mitochondrion;nucleus;other cell component	other molecular function
			COMPLEX I	NDUFAF6	Q330K2	NADH dehydrogenase (ubiquinone) complex I, assembly factor 6 [OS=Homo sapiens]	36	5	5	38.2	38.2	Yes			cell organization and biogenesis;other metabolic processes	other membranes;mitochondrion;nucleus;other cell component
			COMPLEX I	MT-ND4	P03905	NADH-ubiquinone oxidoreductase chain 4 [OS=Homo sapiens]	20	5	5	51.5	51.5	Yes			cell organization and biogenesis;other metabolic processes;stress response;transport;developmental processes;other biological processes	other membranes;mitochondrion	transporter activity;other molecular function
			COMPLEX I	NDUFS2	O75306	NADH dehydrogenase [ubiquinone] iron-sulfur protein 2, mitochondrial [OS=Homo sapiens]	22	4	4	52.5	52.5	Yes	T493	T716;S934;S984;S987	cell cycle OR cell proliferation;cell organization and biogenesis;other metabolic processes;stress response;transport;developmental processes;other biological processes	other membranes;mitochondrion;nucleus	transporter activity;other molecular function
			COMPLEX I	NDUFAB1	O14561	Acyl carrier protein, mitochondrial [OS=Homo sapiens]	62	4	4	17.4	17.4	Yes			cell organization and biogenesis;protein metabolism;other metabolic processes	other membranes;cytosol;mitochondrion;nucleus	translation activity;other molecular function
			COMPLEX I	NDUFS1	P28331	NADH-ubiquinone oxidoreductase 75 kDa subunit, mitochondrial [OS=Homo sapiens]	10	3	3	79.4	79.4	Yes	S674;S675		cell organization and biogenesis;other metabolic processes;transport;other biological processes	other membranes;mitochondrion	transporter activity;other molecular function
			COMPLEX I	NDUFB8	O95169	NADH dehydrogenase [ubiquinone] 1 beta subcomplex subunit 8, mitochondrial [OS=Homo sapiens]	40	3	3	21.8	21.8	Yes	T139	S149;S202;S383	cell organization and biogenesis;other metabolic processes;transport	other membranes;mitochondrion;ER/Golgi	transporter activity
			COMPLEX I	NDUFV1	P49821	NADH dehydrogenase [ubiquinone] flavoprotein 1, mitochondrial [OS=Homo sapiens]	17	3	3	50.8	50.8	Yes		S15;S19;T52	other metabolic processes;transport	other membranes;cytosol;mitochondrion	transporter activity;other molecular function
			COMPLEX I	NDUFA9	Q16795	NADH dehydrogenase [ubiquinone] 1 alpha subcomplex subunit 9, mitochondrial [OS=Homo sapiens]	19	3	3	42.5	42.5	Yes	S372;S503	S218;T659	cell organization and biogenesis;other metabolic processes;transport;other biological processes	other membranes;mitochondrion	transporter activity;other molecular function
			COMPLEX I	NDUFB11	Q9NX14	NADH dehydrogenase [ubiquinone] 1 beta subcomplex subunit 11, mitochondrial [OS=Homo sapiens]	57	3	3	17.3	17.3	Yes	S94	S110;S327;S352;S578;S612;T637;S808;S928;S1018;T1115;T1135;S1227;S1308;S1355;S1375;S1481;S1549;T1736;S1741;T1746;S1780;T1969;S1990;S2026;S2028;T2030;S2076;T2213;S2241;S2289;S2469;S2484;S2486	cell organization and biogenesis;other metabolic processes	other membranes;mitochondrion
			COMPLEX I	NDUFS3	O75489	NADH dehydrogenase [ubiquinone] iron-sulfur protein 3, mitochondrial [OS=Homo sapiens]	25	3	3	30.2	30.2	Yes			cell organization and biogenesis;other metabolic processes;transport;other biological processes	other membranes;mitochondrion;nucleus	transporter activity;other molecular function
			COMPLEX I	TMEM70	Q9BUB7	Transmembrane protein 70, mitochondrial [OS=Homo sapiens]	22	3	3	29	29	Yes		S43	cell organization and biogenesis	other membranes;mitochondrion;nucleus	other molecular function
			COMPLEX I	TIMMDC1	Q9NPL8	Complex I assembly factor TIMMDC1, mitochondrial [OS=Homo sapiens]	28	3	3	32.2	32.2	Yes		S232;S372;S389;T581		other membranes;mitochondrion;nucleus
			COMPLEX I	TMEM126B	Q8IUX1	Complex I assembly factor TMEM126B, mitochondrial [OS=Homo sapiens]	30	3	3	25.9	25.9	Yes		S355	cell organization and biogenesis;other biological processes	other membranes;mitochondrion
			COMPLEX I	NDUFA6	P56556	NADH dehydrogenase [ubiquinone] 1 alpha subcomplex subunit 6 [OS=Homo sapiens]	34	2	2	15.1	15.1	Yes	T951	S21;S37;S341;S523;S573;S585	cell organization and biogenesis;other metabolic processes;stress response;transport	other membranes;mitochondrion	transporter activity
			COMPLEX I	NDUFAF5	Q5TEU4	Arginine-hydroxylase NDUFAF5, mitochondrial [OS=Homo sapiens]	18	2	2	38.9	38.9	Yes		T45;S82;T100;S102;T111;T139	cell organization and biogenesis;protein metabolism;other metabolic processes	other membranes;mitochondrion	other molecular function
			COMPLEX I	NDUFA3	O95167	NADH dehydrogenase [ubiquinone] 1 alpha subcomplex subunit 3 [OS=Homo sapiens]	76	2	2	9.3	9.3	Yes	S473		cell organization and biogenesis;other metabolic processes;transport	other membranes;mitochondrion	transporter activity
			COMPLEX I	NDUFA13	Q9P0J0	NADH dehydrogenase [ubiquinone] 1 alpha subcomplex subunit 13 [OS=Homo sapiens]	30	2	2	16.7	16.7	Yes			cell organization and biogenesis;other metabolic processes;transport;signal transduction;other biological processes	other membranes;mitochondrion;nucleus;other cell component	other molecular function
			COMPLEX I	MT-ND1	P03886	NADH-ubiquinone oxidoreductase chain 1 [OS=Homo sapiens]	22	2	2	35.6	35.6	Yes		S156;T292;T623;S779;S783;S785	cell organization and biogenesis;other metabolic processes;transport	other membranes;mitochondrion	transporter activity
			COMPLEX I	NDUFA5	Q16718-2	Isoform 2 of NADH dehydrogenase [ubiquinone] 1 alpha subcomplex subunit 5 [OS=Homo sapiens]	20	1	1	13.6	13.6	Yes
			COMPLEX I	NDUFA2	O43678	NADH dehydrogenase [ubiquinone] 1 alpha subcomplex subunit 2 [OS=Homo sapiens]	21	1	1	10.9	10.9	Yes	T445;T575;T881;S883	S176;S198;S204;T881;S883	cell organization and biogenesis;other metabolic processes;transport;developmental processes	other membranes;mitochondrion	transporter activity
			COMPLEX I	NDUFB3	O43676	NADH dehydrogenase [ubiquinone] 1 beta subcomplex subunit 3 [OS=Homo sapiens]	21	1	1	11.4	11.4	Yes		S169;S285;T708;S792	cell organization and biogenesis;other metabolic processes;transport	other membranes;mitochondrion	transporter activity
			COMPLEX I	LYRM2	Q9NU23	LYR motif-containing protein 2 [OS=Homo sapiens]	20	1	1	10.4	10.4	Yes			cell organization and biogenesis	mitochondrion
			COMPLEX I	NDUFB4	O95168	NADH dehydrogenase [ubiquinone] 1 beta subcomplex subunit 4 [OS=Homo sapiens]	16	1	1	15.2	15.2	Yes		T641	cell organization and biogenesis;other metabolic processes;stress response;transport	other membranes;mitochondrion;nucleus	transporter activity
			COMPLEX I	MT-ND3	P03897	NADH-ubiquinone oxidoreductase chain 3 [OS=Homo sapiens]	29	1	1	13.2	13.2	Yes	S202		other metabolic processes;stress response;transport;other biological processes	other membranes;mitochondrion	transporter activity
			COMPLEX I	COA1	Q9GZY4	Cytochrome c oxidase assembly factor 1 homolog [OS=Homo sapiens]	21	1	1	16.7	16.7	Yes			cell organization and biogenesis	other membranes;cytosol;mitochondrion
			COMPLEX I	DMAC1	Q96GE9-2	Isoform 2 of Distal membrane-arm assembly complex protein 1 [OS=Homo sapiens]	28	1	1	11.8	11.8	Yes		S23;S25
			COMPLEX I	NDUFB1	O75438	NADH dehydrogenase [ubiquinone] 1 beta subcomplex subunit 1 [OS=Homo sapiens]	52	1	1	7	7	Yes	T231;T237;T241;S243;T249;T255;S263;T267;T273;T283;T291;T295;S297;S303;T337	S409;S686	cell organization and biogenesis;other metabolic processes;transport	other membranes;mitochondrion;nucleus	transporter activity
			COMPLEX I	MT-ND6	P03923	NADH-ubiquinone oxidoreductase chain 6 [OS=Homo sapiens]	21	1	1	18.6	18.6	Yes		S240;S241;T257;S726	cell organization and biogenesis;other metabolic processes;stress response;transport;other biological processes	other membranes;mitochondrion	transporter activity
			COMPLEX II	SDHAF2	Q9NX18	Succinate dehydrogenase assembly factor 2, mitochondrial [OS=Homo sapiens]	60	3	3	19.6	19.6	Yes	S320;S330;S331	S6;S20;S25;S161;S166;S303;S320;S331;S333;T384	cell organization and biogenesis;protein metabolism;other metabolic processes;other biological processes	cytosol;mitochondrion;nucleus
			COMPLEX II	SDHC	Q99643-2	Isoform 2 of Succinate dehydrogenase cytochrome b560 subunit, mitochondrial [OS=Homo sapiens]	21	1	1	16.6	16.6	Yes
			COMPLEX II	SDHAF3	Q9NRP4	Succinate dehydrogenase assembly factor 3, mitochondrial [OS=Homo sapiens]	17	1	1	14.6	14.6	Yes		T142	cell organization and biogenesis;other metabolic processes;other biological processes	mitochondrion
			COMPLEX III	TTC19	Q6DKK2	Tetratricopeptide repeat protein 19, mitochondrial [OS=Homo sapiens]	22	3	3	42.4	42.4	Yes	S165	S132;S133;S165;T184;S199;T200;S202;S206;S239	cell cycle OR cell proliferation;cell organization and biogenesis	other membranes;cytoskeleton;mitochondrion;other cell component
			COMPLEX III	BCS1L	Q9Y276	Mitochondrial chaperone BCS1 [OS=Homo sapiens]	20	3	3	47.5	47.5	Yes			cell organization and biogenesis;transport	other membranes;mitochondrion	other molecular function
			COMPLEX III	UQCRC2	P22695	Cytochrome b-c1 complex subunit 2, mitochondrial [OS=Homo sapiens]	16	3	3	48.4	48.4	Yes		S113;S132;S144;S170;S172;S173;T183;S243;T257;S443	protein metabolism;other metabolic processes	other membranes;mitochondrion;nucleus	other molecular function
			COMPLEX III	UQCC2	Q9BRT2	Ubiquinol-cytochrome-c reductase complex assembly factor 2 [OS=Homo sapiens]	48	2	2	14.9	14.9	Yes	S15;T100;S185;T189;S252;S258;S435;T440;S475;S531;S536;S538;T1001;S1002	S623;S837;S845;S1070;S1273;S1359	cell organization and biogenesis;other biological processes	other membranes;mitochondrion;nucleus
			COMPLEX III	UQCR11	O14957	Cytochrome b-c1 complex subunit 10 [OS=Homo sapiens]	54	1	1	6.6	6.6	Yes		S839;S1416	other metabolic processes	other membranes;mitochondrion	other molecular function
			COMPLEX III	UQCC3	Q6UW78	Ubiquinol-cytochrome-c reductase complex assembly factor 3 [OS=Homo sapiens]	35	1	1	10.1	10.1	Yes		T33;S131;S135;S136;S137;S155;S159	cell organization and biogenesis;other metabolic processes	other membranes;cytosol;mitochondrion;nucleus	other molecular function
			COMPLEX IV	COX10	Q12887-2	Isoform 2 of Protoheme IX farnesyltransferase, mitochondrial [OS=Homo sapiens]	77	8	8	27.6	27.6	Yes
			COMPLEX IV	HIGD1A	Q9Y241-2	Isoform 2 of HIG1 domain family member 1A, mitochondrial [OS=Homo sapiens]	100	6	6	11.8	11.8	Yes		S6;S12;S188
			COMPLEX IV	CEP89	Q96ST8-3	Isoform 3 of Centrosomal protein of 89 kDa [OS=Homo sapiens]	32	5	4	40.3	40.3	Yes		S12;S14
			COMPLEX IV	SCO1	O75880	Protein SCO1 homolog, mitochondrial [OS=Homo sapiens]	31	4	4	33.8	33.8	Yes			cell organization and biogenesis;other biological processes	other membranes;cytoskeleton;mitochondrion	other molecular function
			COMPLEX IV	PNKD	Q8N490-2	Isoform 2 of Probable hydrolase PNKD [OS=Homo sapiens]	60	4	4	15.4	15.4	Yes
			COMPLEX IV	COX5A	P20674	Cytochrome c oxidase subunit 5A, mitochondrial [OS=Homo sapiens]	45	3	3	16.8	16.8	Yes	T200;T215;T217	S13;S75;S173	other metabolic processes;transport	other membranes;mitochondrion	transporter activity;other molecular function
			COMPLEX IV	COA6	Q5JTJ3-2	Isoform 2 of Cytochrome c oxidase assembly factor 6 homolog [OS=Homo sapiens]	25	2	2	18	18	Yes	T241	S21;S117;T129;S141;S145;S148;S184;S194;T232;S239;S251;S253;S324;S330;S381;S434;S512;S569;T610
			COMPLEX IV	TACO1	Q9BSH4	Translational activator of cytochrome c oxidase 1 [OS=Homo sapiens]	10	2	2	32.5	32.5	Yes			cell organization and biogenesis;other biological processes	mitochondrion	translation activity;nucleic acid binding activity
			COMPLEX IV	COX5B	P10606	Cytochrome c oxidase subunit 5B, mitochondrial [OS=Homo sapiens]	56	2	2	13.7	13.7	Yes	S1409	S400;T689;S791;S794;S1148;S1396;S1399	other metabolic processes;transport;other biological processes	other membranes;mitochondrion	transporter activity;other molecular function
			COMPLEX IV	COX8A	P10176	Cytochrome c oxidase subunit 8A, mitochondrial [OS=Homo sapiens]	62	2	2	7.6	7.6	Yes			other metabolic processes;transport	other membranes;mitochondrion	transporter activity
			COMPLEX IV	NDUFA4	O00483	Cytochrome c oxidase subunit NDUFA4 [OS=Homo sapiens]	70	2	2	9.4	9.4	Yes			other metabolic processes;transport;other biological processes	other membranes;mitochondrion	transporter activity;other molecular function
			COMPLEX IV	COA3	Q9Y2R0	Cytochrome c oxidase assembly factor 3 homolog, mitochondrial [OS=Homo sapiens]	56	2	2	11.7	11.7	Yes		S95	cell organization and biogenesis;other biological processes	other membranes;mitochondrion
			COMPLEX IV	COX6B2	Q6YFQ2	Cytochrome c oxidase subunit 6B2 [OS=Homo sapiens]	47	2	2	10.5	10.5	Yes		S465;S466;S483;S492;T510;S1335	other metabolic processes	other membranes;mitochondrion
			COMPLEX IV	COX18	Q8N8Q8-4	Isoform 4 of Cytochrome c oxidase assembly protein COX18, mitochondrial [OS=Homo sapiens]	30	2	2	15.8	15.8	Yes	S126;S127;S132	S11
			COMPLEX IV	SMIM20	Q8N5G0	Small integral membrane protein 20 [OS=Homo sapiens]	76	2	2	7.7	7.7	Yes		S31;S47;S83	cell organization and biogenesis	non-structural extracellular;other membranes;mitochondrion
			COMPLEX IV	COA7	Q96BR5	Cytochrome c oxidase assembly factor 7 [OS=Homo sapiens]	21	2	2	25.7	25.7	Yes		S4		mitochondrion;nucleus
			COMPLEX IV	COX6A1	P12074	Cytochrome c oxidase subunit 6A1, mitochondrial [OS=Homo sapiens]	33	1	1	12.1	12.1	Yes	S150	S176;S283;S286;S307;S357;S367;S391;S395;S494;S538;S547;S553	other metabolic processes	other membranes;mitochondrion	enzyme regulator activity;other molecular function
			COMPLEX IV	COX6C	P09669	Cytochrome c oxidase subunit 6C [OS=Homo sapiens]	28	1	1	8.8	8.8	Yes			other metabolic processes	other membranes;mitochondrion
			COMPLEX IV	COX17	Q14061	Cytochrome c oxidase copper chaperone [OS=Homo sapiens]	48	1	1	6.9	6.9	Yes			cell organization and biogenesis;other metabolic processes;transport;other biological processes	mitochondrion;other cell component	enzyme regulator activity;other molecular function
			COMPLEX IV	COX6B1	P14854	Cytochrome c oxidase subunit 6B1 [OS=Homo sapiens]	23	1	1	10.2	10.2	Yes	S162;S224;S745	T8;T21;T46;S185;S350;T359;T904	other metabolic processes;transport	other membranes;mitochondrion	transporter activity
			COMPLEX IV	COX7C	P15954	Cytochrome c oxidase subunit 7C, mitochondrial [OS=Homo sapiens]	44	1	1	7.2	7.2	Yes		T121	other metabolic processes;transport	other membranes;mitochondrion
			COMPLEX IV	COX14	Q96I36	Cytochrome c oxidase assembly protein COX14 [OS=Homo sapiens]	49	1	1	6.6	6.6	Yes	S435		cell organization and biogenesis	other membranes;mitochondrion
			COMPLEX IV	COX6A2	Q02221	Cytochrome c oxidase subunit 6A2, mitochondrial [OS=Homo sapiens]	27	1	1	10.8	10.8	Yes			other metabolic processes	other membranes;mitochondrion	enzyme regulator activity;other molecular function
			COMPLEX IV	COX7B	P24311	Cytochrome c oxidase subunit 7B, mitochondrial [OS=Homo sapiens]	21	1	1	9.2	9.2	Yes			other metabolic processes;transport;developmental processes	other membranes;mitochondrion	transporter activity
			COMPLEX IV	COX7A2L	O14548	Cytochrome c oxidase subunit 7A-related protein, mitochondrial [OS=Homo sapiens]	29	1	1	12.6	12.6	Yes	T85;T95;S103		cell organization and biogenesis;other metabolic processes;transport;other biological processes	other membranes;mitochondrion;nucleus	transporter activity
			COMPLEX IV	PET117	Q6UWS5	Protein PET117 homolog, mitochondrial [OS=Homo sapiens]	25	1	1	9.2	9.2	Yes			cell organization and biogenesis	mitochondrion
			COMPLEX V	ATP5F1B	P06576	ATP synthase subunit beta, mitochondrial [OS=Homo sapiens]	38	7	7	56.5	56.5	Yes			other metabolic processes;transport;developmental processes;other biological processes	plasma membrane;other membranes;mitochondrion;other cell component	signal transduction activity or receptor binding;transporter activity;other molecular function
			COMPLEX V	ATPAF1	Q5TC12	ATP synthase mitochondrial F1 complex assembly factor 1 [OS=Homo sapiens]	53	6	6	36.4	36.4	Yes	S2;S4		cell organization and biogenesis	mitochondrion
			COMPLEX V	ATP5MC1	P05496	ATP synthase F(0) complex subunit C1, mitochondrial [OS=Homo sapiens]	100	6	4	14.3	14.3	Yes			other metabolic processes;transport	other membranes;mitochondrion	transporter activity;other molecular function
			COMPLEX V	TMEM70	Q9BUB7	Transmembrane protein 70, mitochondrial [OS=Homo sapiens]	22	3	3	29	29	Yes	S11	T4;T7;S11;T12;S29;S32;T42;S58;T81;S87;T108	cell organization and biogenesis	other membranes;mitochondrion;nucleus	other molecular function
			COMPLEX V	ATPSCKMT	Q6P4H8	ATP synthase subunit C lysine N-methyltransferase [OS=Homo sapiens]	42	3	3	26.1	26.1	Yes	T148	S73;S94;S99;S115;S117;S134;S750	cell organization and biogenesis;protein metabolism;other metabolic processes;other biological processes	other membranes;mitochondrion	other molecular function
			COMPLEX V	ATP5MG	O75964	ATP synthase subunit g, mitochondrial [OS=Homo sapiens]	62	2	2	11.4	11.4	Yes	S75	S5;S358;S428	other metabolic processes;transport	other membranes;mitochondrion	transporter activity
			COMPLEX V	ATP5MC2	Q06055	ATP synthase F(0) complex subunit C2, mitochondrial [OS=Homo sapiens]	45	2	2	14.6	14.6	Yes			other metabolic processes;transport	other membranes;mitochondrion	transporter activity;other molecular function
			COMPLEX V	DMAC2L	Q99766-2	Isoform 2 of ATP synthase subunit s, mitochondrial [OS=Homo sapiens]	41	2	1	15.7	15.7	Yes		S291
			COMPLEX V	ATP5F1D	P30049	ATP synthase subunit delta, mitochondrial [OS=Homo sapiens]	21	1	1	17.5	17.5	Yes	T255;S262		cell organization and biogenesis;other metabolic processes;transport;other biological processes	other membranes;mitochondrion	transporter activity
			COMPLEX V	FMC1	Q96HJ9	Protein FMC1 homolog [OS=Homo sapiens]	20	1	1	12.7	12.7	Yes	S167;T330	S151;S188;S641;S648	cell organization and biogenesis;other biological processes	mitochondrion
			COMPLEX V	ATP5MF	P56134	ATP synthase subunit f, mitochondrial [OS=Homo sapiens]	30	1	1	10.9	10.9	Yes			other metabolic processes;transport	other membranes;mitochondrion;nucleus
			COMPLEX V	MT-ATP8	P03928	ATP synthase protein 8 [OS=Homo sapiens]	40	1	1	8	8	Yes		T399;S568;S1141;S1169	other metabolic processes;transport	other membranes;mitochondrion	transporter activity
		Hs578t	COMPLEX I	ACAD9	Q9H845	Complex I assembly factor ACAD9, mitochondrial [OS=Homo sapiens]	47	13	13	68.7	7.96	Yes	T478	S268;S302;S309	cell organization and biogenesis;other metabolic processes	other membranes;mitochondrion;nucleus;other cell component	other molecular function
			COMPLEX I	MT-ND4	P03905	NADH-ubiquinone oxidoreductase chain 4 [OS=Homo sapiens]	39	12	12	51.5	9.35	Yes	-	-	cell organization and biogenesis;other metabolic processes;stress response;transport;developmental processes;other biological processes	other membranes;mitochondrion	transporter activity;other molecular function
			COMPLEX I	NDUFS1	P28331	NADH-ubiquinone oxidoreductase 75 kDa subunit, mitochondrial [OS=Homo sapiens]	26	7	5	79.4	6.23	Yes	S259;S318	S259;S318	cell organization and biogenesis;other metabolic processes;transport;other biological processes	other membranes;mitochondrion	transporter activity;other molecular function
			COMPLEX I	NDUFS3	O75489	NADH dehydrogenase [ubiquinone] iron-sulfur protein 3, mitochondrial [OS=Homo sapiens]	51	7	7	30.2	7.5	Yes	T21	T21	cell organization and biogenesis;other metabolic processes;transport;other biological processes	other membranes;mitochondrion;nucleus	transporter activity;other molecular function
			COMPLEX I	NDUFAF7	Q7L592	Protein arginine methyltransferase NDUFAF7, mitochondrial [OS=Homo sapiens]	34	7	7	49.2	8.34	-			cell organization and biogenesis;protein metabolism;other metabolic processes	mitochondrion	other molecular function
			COMPLEX I	MT-ND5	P03915	NADH-ubiquinone oxidoreductase chain 5 [OS=Homo sapiens]	33	7	7	67	9.03	Yes	-	-	cell organization and biogenesis;other metabolic processes;stress response;transport;other biological processes	other membranes;mitochondrion;other cell component	transporter activity;other molecular function
			COMPLEX I	AIFM1	O95831	Apoptosis-inducing factor 1, mitochondrial [OS=Homo sapiens]	24	6	6	66.9	8.95	Yes	S60	S60	cell organization and biogenesis;stress response;transport;developmental processes;signal transduction;other biological processes	other membranes;cytosol;mitochondrion;nucleus;other cell component	nucleic acid binding activity;other molecular function
			COMPLEX I	NDUFA9	Q16795	NADH dehydrogenase [ubiquinone] 1 alpha subcomplex subunit 9, mitochondrial [OS=Homo sapiens]	43	6	6	42.5	9.8	Yes	-	-	cell organization and biogenesis;other metabolic processes;transport;other biological processes	other membranes;mitochondrion	transporter activity;other molecular function
			COMPLEX I	TMEM126A	Q9H061	Transmembrane protein 126A [OS=Homo sapiens]	78	5	5	21.5	9.26	Yes	-	-	cell organization and biogenesis;developmental processes;signal transduction	plasma membrane;other membranes;mitochondrion
			COMPLEX I	NDUFS2	O75306	NADH dehydrogenase [ubiquinone] iron-sulfur protein 2, mitochondrial [OS=Homo sapiens]	25	4	4	52.5	7.55	Yes	-	-	cell cycle OR cell proliferation;cell organization and biogenesis;other metabolic processes;stress response;transport;developmental processes;other biological processes	other membranes;mitochondrion;nucleus	transporter activity;other molecular function
			COMPLEX I	NDUFB6	O95139	NADH dehydrogenase [ubiquinone] 1 beta subcomplex subunit 6 [OS=Homo sapiens]	64	4	4	15.5	9.63	Yes	-	-	cell organization and biogenesis;other metabolic processes;transport	other membranes;mitochondrion;nucleus	transporter activity
			COMPLEX I	TMEM70	Q9BUB7	Transmembrane protein 70, mitochondrial [OS=Homo sapiens]	32	4	4	29	8.91	-			cell organization and biogenesis	other membranes;mitochondrion;nucleus	other molecular function
			COMPLEX I	NDUFA3	O95167	NADH dehydrogenase [ubiquinone] 1 alpha subcomplex subunit 3 [OS=Homo sapiens]	100	4	4	9.3	8.46	-			cell organization and biogenesis;other metabolic processes;transport	other membranes;mitochondrion	transporter activity
			COMPLEX I	MT-ND3	P03897	NADH-ubiquinone oxidoreductase chain 3 [OS=Homo sapiens]	100	4	4	13.2	4.44	Yes	T35	T35	other metabolic processes;stress response;transport;other biological processes	other membranes;mitochondrion	transporter activity
			COMPLEX I	NDUFS8	O00217	NADH dehydrogenase [ubiquinone] iron-sulfur protein 8, mitochondrial [OS=Homo sapiens]	35	3	3	23.7	6.34	Yes	-	-	cell organization and biogenesis;other metabolic processes;stress response;transport	other membranes;mitochondrion	transporter activity;other molecular function
			COMPLEX I	NDUFAF1	Q9Y375	Complex I intermediate-associated protein 30, mitochondrial [OS=Homo sapiens]	27	3	3	37.7	7.64	-			cell organization and biogenesis;other metabolic processes	other membranes;cytosol;mitochondrion	other molecular function
			COMPLEX I	NDUFB10	O96000	NADH dehydrogenase [ubiquinone] 1 beta subcomplex subunit 10 [OS=Homo sapiens]	29	3	3	20.8	8.48	Yes	-	-	cell organization and biogenesis;other metabolic processes;transport	other membranes;mitochondrion	transporter activity
			COMPLEX I	NDUFV3	P56181	NADH dehydrogenase [ubiquinone] flavoprotein 3, mitochondrial [OS=Homo sapiens]	61	3	3	11.9	9.7	-			other metabolic processes;transport	other membranes;mitochondrion	transporter activity
			COMPLEX I	NDUFB8	O95169	NADH dehydrogenase [ubiquinone] 1 beta subcomplex subunit 8, mitochondrial [OS=Homo sapiens]	35	3	3	21.8	6.8	Yes	T28	T28	cell organization and biogenesis;other metabolic processes;transport	other membranes;mitochondrion;ER/Golgi	transporter activity
			COMPLEX I	NDUFA5	Q16718	NADH dehydrogenase [ubiquinone] 1 alpha subcomplex subunit 5 [OS=Homo sapiens]	57	3	3	13.5	5.99	-			cell organization and biogenesis;other metabolic processes;transport	other membranes;mitochondrion	transporter activity
			COMPLEX I	NUBPL	Q8TB37	Iron-sulfur protein NUBPL [OS=Homo sapiens]	20	3	3	34.1	9.04	-			cell organization and biogenesis;other metabolic processes	plasma membrane;other membranes;mitochondrion	other molecular function
			COMPLEX I	NDUFB11	Q9NX14	NADH dehydrogenase [ubiquinone] 1 beta subcomplex subunit 11, mitochondrial [OS=Homo sapiens]	32	3	3	17.3	5.22	Yes	S9	S9	cell organization and biogenesis;other metabolic processes	other membranes;mitochondrion
			COMPLEX I	MT-ND1	P03886	NADH-ubiquinone oxidoreductase chain 1 [OS=Homo sapiens]	33	3	3	35.6	6.55	Yes	-	-	cell organization and biogenesis;other metabolic processes;transport	other membranes;mitochondrion	transporter activity
			COMPLEX I	NDUFS7	O75251-2	Isoform 2 of NADH dehydrogenase [ubiquinone] iron-sulfur protein 7, mitochondrial [OS=Homo sapiens]	25	2	2	22.2	9.88	-
			COMPLEX I	NDUFB5	O43674	NADH dehydrogenase [ubiquinone] 1 beta subcomplex subunit 5, mitochondrial [OS=Homo sapiens]	21	2	2	21.7	9.63	Yes	-	-	cell organization and biogenesis;other metabolic processes;transport	other membranes;mitochondrion;nucleus	transporter activity
			COMPLEX I	NDUFA12	Q9UI09	NADH dehydrogenase [ubiquinone] 1 alpha subcomplex subunit 12 [OS=Homo sapiens]	33	2	2	17.1	9.63	Yes	-	-	cell organization and biogenesis;other metabolic processes;stress response;transport;other biological processes	other membranes;cytosol;mitochondrion	transporter activity
			COMPLEX I	NDUFB7	P17568	NADH dehydrogenase [ubiquinone] 1 beta subcomplex subunit 7 [OS=Homo sapiens]	27	2	2	16.4	8.92	Yes	-	-	cell organization and biogenesis;other metabolic processes;transport	other membranes;mitochondrion	transporter activity
			COMPLEX I	NDUFA11	Q86Y39	NADH dehydrogenase [ubiquinone] 1 alpha subcomplex subunit 11 [OS=Homo sapiens]	38	2	2	14.8	8.72	Yes	-	-	cell organization and biogenesis;other metabolic processes	other membranes;mitochondrion
			COMPLEX I	NDUFB1	O75438-2	Isoform 2 of NADH dehydrogenase [ubiquinone] 1 beta subcomplex subunit 1 [OS=Homo sapiens]	53	2	2	11.9	8.73	-
			COMPLEX I	NDUFA6	P56556	NADH dehydrogenase [ubiquinone] 1 alpha subcomplex subunit 6 [OS=Homo sapiens]	29	2	2	15.1	9.98	-			cell organization and biogenesis;other metabolic processes;stress response;transport	other membranes;mitochondrion	transporter activity
			COMPLEX I	NDUFB3	O43676	NADH dehydrogenase [ubiquinone] 1 beta subcomplex subunit 3 [OS=Homo sapiens]	40	2	2	11.4	9.2	-			cell organization and biogenesis;other metabolic processes;transport	other membranes;mitochondrion	transporter activity
			COMPLEX I	NDUFAF2	Q8N183	NADH dehydrogenase [ubiquinone] 1 alpha subcomplex assembly factor 2 [OS=Homo sapiens]	23	2	2	19.8	8.97	Yes	S14;S144	S14;S144	cell organization and biogenesis;other biological processes	other membranes;mitochondrion	other molecular function
			COMPLEX I	NDUFA7	O95182	NADH dehydrogenase [ubiquinone] 1 alpha subcomplex subunit 7 [OS=Homo sapiens]	28	1	1	12.5	10.18	-			protein metabolism;other metabolic processes;transport	other membranes;mitochondrion;translational apparatus	transporter activity;other molecular function
			COMPLEX I	NDUFB4	O95168	NADH dehydrogenase [ubiquinone] 1 beta subcomplex subunit 4 [OS=Homo sapiens]	23	1	1	15.2	9.85	-			cell organization and biogenesis;other metabolic processes;stress response;transport	other membranes;mitochondrion;nucleus	transporter activity
			COMPLEX I	COA1	Q9GZY4	Cytochrome c oxidase assembly factor 1 homolog [OS=Homo sapiens]	21	1	1	16.7	8.81	-			cell organization and biogenesis	other membranes;cytosol;mitochondrion
			COMPLEX I	NDUFC1	O43677	NADH dehydrogenase [ubiquinone] 1 subunit C1, mitochondrial [OS=Homo sapiens]	24	1	1	8.7	10.2	-			cell organization and biogenesis;other metabolic processes;transport	other membranes;mitochondrion	transporter activity
			COMPLEX I	LYRM2	Q9NU23	LYR motif-containing protein 2 [OS=Homo sapiens]	25	1	1	10.4	10.46	Yes	-	-	cell organization and biogenesis	mitochondrion
			COMPLEX I	NDUFAF8	A1L188	NADH dehydrogenase [ubiquinone] 1 alpha subcomplex assembly factor 8 [OS=Homo sapiens]	36	1	1	7.8	9.32	Yes	-	-	cell organization and biogenesis	mitochondrion
			COMPLEX I	DMAC1	Q96GE9-2	Isoform 2 of Distal membrane-arm assembly complex protein 1 [OS=Homo sapiens]	31	1	1	11.8	9.92	-
			COMPLEX II	SDHA	P31040	Succinate dehydrogenase [ubiquinone] flavoprotein subunit, mitochondrial [OS=Homo sapiens]	19	4	4	72.6	7.39	Yes	T348	T348	other metabolic processes;developmental processes	other membranes;mitochondrion;nucleus	other molecular function
			COMPLEX II	SDHAF1	A6NFY7	Succinate dehydrogenase assembly factor 1, mitochondrial [OS=Homo sapiens]	90	3	3	12.8	11.39	-			cell organization and biogenesis	mitochondrion;nucleus
			COMPLEX II	SDHAF2	Q9NX18	Succinate dehydrogenase assembly factor 2, mitochondrial [OS=Homo sapiens]	58	3	3	19.6	6.8	Yes	-	-	cell organization and biogenesis;protein metabolism;other metabolic processes;other biological processes	cytosol;mitochondrion;nucleus
			COMPLEX II	SDHB	P21912	Succinate dehydrogenase [ubiquinone] iron-sulfur subunit, mitochondrial [OS=Homo sapiens]	19	2	2	31.6	8.76	Yes	T35	T35	other metabolic processes	plasma membrane;other membranes;mitochondrion;nucleus	other molecular function
			COMPLEX II	SDHAF3	Q9NRP4	Succinate dehydrogenase assembly factor 3, mitochondrial [OS=Homo sapiens]	25	1	1	14.6	9.07	-			cell organization and biogenesis;other metabolic processes;other biological processes	mitochondrion
			COMPLEX II	SDHAF4	Q5VUM1	Succinate dehydrogenase assembly factor 4, mitochondrial [OS=Homo sapiens]	20	1	1	12.2	9.36	-			cell organization and biogenesis;other metabolic processes;stress response;other biological processes	mitochondrion	enzyme regulator activity
			COMPLEX III	CYC1	P08574	Cytochrome c1, heme protein, mitochondrial [OS=Homo sapiens]	44	8	8	35.4	9	Yes	-	-	other metabolic processes;transport;other biological processes	other membranes;mitochondrion	transporter activity;other molecular function
			COMPLEX III	UQCRC2	P22695	Cytochrome b-c1 complex subunit 2, mitochondrial [OS=Homo sapiens]	41	7	7	48.4	8.63	Yes	S367;T369	S367;T369	protein metabolism;other metabolic processes	other membranes;mitochondrion;nucleus	other molecular function
			COMPLEX III	TTC19	Q6DKK2	Tetratricopeptide repeat protein 19, mitochondrial [OS=Homo sapiens]	39	7	7	42.4	5.77	-			cell cycle OR cell proliferation;cell organization and biogenesis	other membranes;cytoskeleton;mitochondrion;other cell component
			COMPLEX III	UQCRC1	P31930	Cytochrome b-c1 complex subunit 1, mitochondrial [OS=Homo sapiens]	23	6	6	52.6	6.37	Yes	-	-	other metabolic processes;transport;other biological processes	other membranes;mitochondrion	transporter activity;other molecular function
			COMPLEX III	UQCC1	Q9NVA1	Ubiquinol-cytochrome-c reductase complex assembly factor 1 [OS=Homo sapiens]	24	3	3	34.6	8.91	Yes	-	-	cell organization and biogenesis	other membranes;mitochondrion;other cell component
			COMPLEX III	BCS1L	Q9Y276	Mitochondrial chaperone BCS1 [OS=Homo sapiens]	24	3	3	47.5	8.5	Yes	-	-	cell organization and biogenesis;transport	other membranes;mitochondrion	other molecular function
			COMPLEX III	UQCC2	Q9BRT2	Ubiquinol-cytochrome-c reductase complex assembly factor 2 [OS=Homo sapiens]	59	3	3	14.9	7.37	Yes	-	-	cell organization and biogenesis;other biological processes	other membranes;mitochondrion;nucleus
			COMPLEX III	MT-CYB	P00156	Cytochrome b [OS=Homo sapiens]	24	3	3	42.7	8.05	-			other metabolic processes;transport	other membranes;mitochondrion	transporter activity;other molecular function
			COMPLEX III	UQCC3	Q6UW78	Ubiquinol-cytochrome-c reductase complex assembly factor 3 [OS=Homo sapiens]	65	3	3	10.1	9.41	-			cell organization and biogenesis;other metabolic processes	other membranes;cytosol;mitochondrion;nucleus	other molecular function
			COMPLEX III	UQCRH	P07919	Cytochrome b-c1 complex subunit 6, mitochondrial [OS=Homo sapiens]	20	1	1	10.7	4.44	-			other metabolic processes;transport	other membranes;mitochondrion	transporter activity
			COMPLEX III	UQCR11	O14957	Cytochrome b-c1 complex subunit 10 [OS=Homo sapiens]	54	1	1	6.6	9.88	-			other metabolic processes	other membranes;mitochondrion	other molecular function
			COMPLEX IV	SCO1	O75880	Protein SCO1 homolog, mitochondrial [OS=Homo sapiens]	56	10	10	33.8	8.88	-			cell organization and biogenesis;other biological processes	other membranes;cytoskeleton;mitochondrion	other molecular function
			COMPLEX IV	COA7	Q96BR5	Cytochrome c oxidase assembly factor 7 [OS=Homo sapiens]	100	10	10	25.7	6.02	Yes	-	-		mitochondrion;nucleus
			COMPLEX IV	HIGD1A	Q9Y241-2	Isoform 2 of HIG1 domain family member 1A, mitochondrial [OS=Homo sapiens]	100	5	4	11.8	9.44	-
			COMPLEX IV	COX10	Q12887	Protoheme IX farnesyltransferase, mitochondrial [OS=Homo sapiens]	21	5	4	48.9	9.19	-			cell organization and biogenesis;other metabolic processes	other membranes;cytosol;mitochondrion;nucleus;other cell component	other molecular function
			COMPLEX IV	COX7C	P15954	Cytochrome c oxidase subunit 7C, mitochondrial [OS=Homo sapiens]	100	4	4	7.2	10.27	-			other metabolic processes;transport	other membranes;mitochondrion
			COMPLEX IV	CEP89	Q96ST8-2	Isoform 2 of Centrosomal protein of 89 kDa [OS=Homo sapiens]	14	4	3	62.1	6.7	-
			COMPLEX IV	TIMM21	Q9BVV7	Mitochondrial import inner membrane translocase subunit Tim21 [OS=Homo sapiens]	37	3	3	28.2	9.7	Yes	T61;S98	T61;S98	cell organization and biogenesis;transport	other membranes;mitochondrion
			COMPLEX IV	COX6A1	P12074	Cytochrome c oxidase subunit 6A1, mitochondrial [OS=Homo sapiens]	69	3	3	12.1	9.32	-			other metabolic processes	other membranes;mitochondrion	enzyme regulator activity;other molecular function
			COMPLEX IV	PNKD	Q8N490-2	Isoform 2 of Probable hydrolase PNKD [OS=Homo sapiens]	45	3	3	15.4	10.58	-
			COMPLEX IV	COX5B	P10606	Cytochrome c oxidase subunit 5B, mitochondrial [OS=Homo sapiens]	52	2	2	13.7	8.81	-			other metabolic processes;transport;other biological processes	other membranes;mitochondrion	transporter activity;other molecular function
			COMPLEX IV	COX6A2	Q02221	Cytochrome c oxidase subunit 6A2, mitochondrial [OS=Homo sapiens]	59	2	2	10.8	10.9	-			other metabolic processes	other membranes;mitochondrion	enzyme regulator activity;other molecular function
			COMPLEX IV	MT-CO1	P00395	Cytochrome c oxidase subunit 1 [OS=Homo sapiens]	12	2	2	57	6.7	Yes	S455	S455	other metabolic processes;stress response;transport;developmental processes;other biological processes	other membranes;mitochondrion	transporter activity;other molecular function
			COMPLEX IV	COX5A	P20674	Cytochrome c oxidase subunit 5A, mitochondrial [OS=Homo sapiens]	30	2	2	16.8	6.79	Yes	-	-	other metabolic processes;transport	other membranes;mitochondrion	transporter activity;other molecular function
			COMPLEX IV	TACO1	Q9BSH4	Translational activator of cytochrome c oxidase 1 [OS=Homo sapiens]	16	2	2	32.5	8.13	Yes	S2	S2	cell organization and biogenesis;other biological processes	mitochondrion	translation activity;nucleic acid binding activity
			COMPLEX IV	SCO2	O43819	Protein SCO2 homolog, mitochondrial [OS=Homo sapiens]	19	2	2	29.8	8.85	Yes	-	-	cell organization and biogenesis;other metabolic processes;developmental processes;other biological processes	other membranes;cytoskeleton;mitochondrion	other molecular function
			COMPLEX IV	SMIM20	Q8N5G0	Small integral membrane protein 20 [OS=Homo sapiens]	94	2	2	7.7	9.86	-			cell organization and biogenesis	non-structural extracellular;other membranes;mitochondrion
			COMPLEX IV	PET117	Q6UWS5	Protein PET117 homolog, mitochondrial [OS=Homo sapiens]	59	2	2	9.2	10.1	-			cell organization and biogenesis	mitochondrion
			COMPLEX IV	CMC2	Q9NRP2	COX assembly mitochondrial protein 2 homolog [OS=Homo sapiens]	41	1	1	9.5	7.87	Yes	-	-		mitochondrion
			COMPLEX IV	NDUFA4	O00483	Cytochrome c oxidase subunit NDUFA4 [OS=Homo sapiens]	25	1	1	9.4	9.38	Yes	-	-	other metabolic processes;transport;other biological processes	other membranes;mitochondrion	transporter activity;other molecular function
			COMPLEX IV	COA3	Q9Y2R0	Cytochrome c oxidase assembly factor 3 homolog, mitochondrial [OS=Homo sapiens]	28	1	1	11.7	9.6	-			cell organization and biogenesis;other biological processes	other membranes;mitochondrion
			COMPLEX IV	COX6C	P09669	Cytochrome c oxidase subunit 6C [OS=Homo sapiens]	23	1	1	8.8	10.39	-			other metabolic processes	other membranes;mitochondrion
			COMPLEX IV	COA1	Q9GZY4	Cytochrome c oxidase assembly factor 1 homolog [OS=Homo sapiens]	21	1	1	16.7	8.81	-			cell organization and biogenesis	other membranes;cytosol;mitochondrion
			COMPLEX IV	CMC1	Q7Z7K0	COX assembly mitochondrial protein homolog [OS=Homo sapiens]	26	1	1	12.5	8.63	-				mitochondrion	other molecular function
			COMPLEX IV	COA5	Q86WW8	Cytochrome c oxidase assembly factor 5 [OS=Homo sapiens]	49	1	1	8.4	8.68	-			cell organization and biogenesis	mitochondrion
			COMPLEX IV	COA4	Q9NYJ1-2	Isoform 2 of Cytochrome c oxidase assembly factor 4 homolog, mitochondrial [OS=Homo sapiens]	20	1	1	11.3	6.67	-
			COMPLEX V	ATP5F1A	P25705	ATP synthase subunit alpha, mitochondrial [OS=Homo sapiens]	34	8	8	59.7	9.13	Yes	T46;T48;T225;T383;T432	T46;T48;T225;T383;T432	other metabolic processes;transport;other biological processes	plasma membrane;other membranes;mitochondrion;nucleus;other cell component	signal transduction activity or receptor binding;transporter activity;other molecular function
			COMPLEX V	ATP5F1B	P06576	ATP synthase subunit beta, mitochondrial [OS=Homo sapiens]	33	7	7	56.5	5.4	Yes	S327	S327	other metabolic processes;transport;developmental processes;other biological processes	plasma membrane;other membranes;mitochondrion;other cell component	signal transduction activity or receptor binding;transporter activity;other molecular function
			COMPLEX V	ATP5MG	O75964	ATP synthase subunit g, mitochondrial [OS=Homo sapiens]	97	4	4	11.4	9.64	-			other metabolic processes;transport	other membranes;mitochondrion	transporter activity
			COMPLEX V	TMEM70	Q9BUB7	Transmembrane protein 70, mitochondrial [OS=Homo sapiens]	32	4	4	29	8.91	-			cell organization and biogenesis	other membranes;mitochondrion;nucleus	other molecular function
			COMPLEX V	ATP5F1C	P36542	ATP synthase subunit gamma, mitochondrial [OS=Homo sapiens]	35	4	4	33	9.22	Yes	-	-	other metabolic processes;transport	other membranes;mitochondrion	transporter activity
			COMPLEX V	ATP5PB	P24539	ATP synthase F(0) complex subunit B1, mitochondrial [OS=Homo sapiens]	41	4	4	28.9	9.36	Yes	-	-	other metabolic processes;transport	other membranes;mitochondrion	transporter activity
			COMPLEX V	ATP5PF	P18859	ATP synthase-coupling factor 6, mitochondrial [OS=Homo sapiens]	52	3	3	12.6	9.52	-			other metabolic processes;transport	other membranes;mitochondrion	transporter activity
			COMPLEX V	ATP5IF1	Q9UII2	ATPase inhibitor, mitochondrial [OS=Homo sapiens]	47	2	2	12.2	9.35	Yes	-	-	cell organization and biogenesis;other metabolic processes;stress response;transport;developmental processes;other biological processes	mitochondrion;other cell component	enzyme regulator activity;other molecular function
			COMPLEX V	MT-ATP6	P00846	ATP synthase subunit a [OS=Homo sapiens]	30	2	2	24.8	10.1	Yes	-	-	other metabolic processes;stress response;transport	other membranes;mitochondrion	transporter activity
			COMPLEX V	ATPAF1	Q5TC12	ATP synthase mitochondrial F1 complex assembly factor 1 [OS=Homo sapiens]	17	2	2	36.4	7.96	Yes	-	-	cell organization and biogenesis	mitochondrion
			COMPLEX V	DMAC2L	Q99766-3	Isoform 3 of ATP synthase subunit s, mitochondrial [OS=Homo sapiens]	42	2	2	14.7	7.17	-
			COMPLEX V	ATPSCKMT	Q6P4H8	ATP synthase subunit C lysine N-methyltransferase [OS=Homo sapiens]	27	2	2	26.1	8.87	-			cell organization and biogenesis;protein metabolism;other metabolic processes;other biological processes	other membranes;mitochondrion	other molecular function
			COMPLEX V	ATP5F1E	P56381	ATP synthase subunit epsilon, mitochondrial [OS=Homo sapiens]	41	1	1	5.8	9.92	Yes	-	-	other metabolic processes;transport	other membranes;mitochondrion	transporter activity;other molecular function
			COMPLEX V	ATP5MF	P56134	ATP synthase subunit f, mitochondrial [OS=Homo sapiens]	31	1	1	10.9	9.67	Yes	-	-	other metabolic processes;transport	other membranes;mitochondrion;nucleus
			COMPLEX V	MT-ATP8	P03928	ATP synthase protein 8 [OS=Homo sapiens]	40	1	1	8	9.91	-			other metabolic processes;transport	other membranes;mitochondrion	transporter activity
			COMPLEX V	ATP5MC2	Q06055-3	Isoform 3 of ATP synthase F(0) complex subunit C2, mitochondrial [OS=Homo sapiens]	20	1	1	16.3	9.03	-
